# Supplementary material for: Convenient route to Fmoc-homotyrosine via metallaphotoredox catalysis and its use in the total synthesis of anabaenopeptin cyclic peptides
Source: Royal Society of Chemistry journal article supplement (doi:10.1039/d3ob01608k), 2023-01-01
Supplement: d3ob01608k1.pdf [file d3ob01608k1.pdf]

## Supplementary Information

### Convenient route to Fmoc-homotyrosine via metallaphotoredox catalysis and its use in the total synthesis of anabaenopeptin cyclic peptides

Christopher Bérubé,<sup>a,b</sup> Louis-David Guay,<sup>a,b</sup> Tommy Fraser,<sup>c</sup> Victor Lapointe,<sup>a,b</sup> Sébastien Cardinal,<sup>c</sup> and Éric Biron<sup>a,b,\*</sup>

<sup>a</sup> Faculté de pharmacie, Université Laval, Québec, Québec, Canada, G1V 0A6

<sup>b</sup> Laboratory of Medicinal Chemistry, Centre de recherche du CHU de Québec-Université Laval, 2705 Boulevard Laurier, Québec, Québec, Canada, G1V 0A6

<sup>c</sup> Département de biologie, chimie et géographie, Université de Rimouski, 300 allée des Ursulines, Rimouski, Québec, Canada, G5L 3A1

Corresponding author: [Eric.Biron@pha.ulaval.ca](mailto:Eric.Biron@pha.ulaval.ca)

#### Table of Contents

|                                                                                                                                                                            |           |
|----------------------------------------------------------------------------------------------------------------------------------------------------------------------------|-----------|
| <b>Figure S1.</b> Characterization of anabaenopeptin F ( <b>1</b> ). .....                                                                                                 | <b>1</b>  |
| <b>Figure S2.</b> Characterization of (2S)-2-amino-4-bromobutanoic acid hydrobromide compounds ( <b>4</b> ). .....                                                         | <b>7</b>  |
| <b>Figure S3.</b> Characterization of methyl (2S)-4-bromo-2-([(9H-fluoren-9-ylmethoxy)carbonyl]amino)butanoate ( <b>5</b> ). .....                                         | <b>11</b> |
| <b>Figure S4.</b> Characterization of 4-tert-butoxyphenyl bromide ( <b>6</b> ). .....                                                                                      | <b>15</b> |
| <b>Figure S5.</b> Characterization of methyl (2S)-4-(4-tert-butoxyphenyl)-2-([(9H-fluoren-9-ylmethoxy)carbonyl]amino)butanoate (Fmoc-L-Htyr(OtBu)-OMe) ( <b>7</b> ). ..... | <b>17</b> |
| <b>Figure S6.</b> Characterization of (2S)-4-(4-tert-butoxyphenyl)-2-([(9H-fluoren-9-ylmethoxy)carbonyl]amino)butanoic acid (Fmoc-L-Htyr(OtBu)-OH) ( <b>8</b> ). .....     | <b>21</b> |
| <b>Figure S7.</b> Characterization of Boc-D-Lys(Fmoc)-Oall. ....                                                                                                           | <b>25</b> |
| <b>Figure S8.</b> Characterization of anabaenopeptin F L-allo-Ile4 ( <b>10</b> ). .....                                                                                    | <b>28</b> |
| <b>Figure S9.</b> Carboxypeptidase B inhibition assay of anabaenopeptin F ( <b>1</b> ) (left) and anabaenopeptin F L-allo-Ile4 ( <b>10</b> ) (right). .....                | <b>33</b> |
| <b>Table S1.</b> Chemical shift table of isolated and synthetic ABP F ( <b>1</b> ) and ( <b>10</b> ) .....                                                                 | <b>34</b> |

**Figure S1.** Characterization of anabaenopeptin F (**1**).

a) HPLC profile of purified anabaenopeptin F (**1**) ( $\lambda = 220\text{nm}$ )

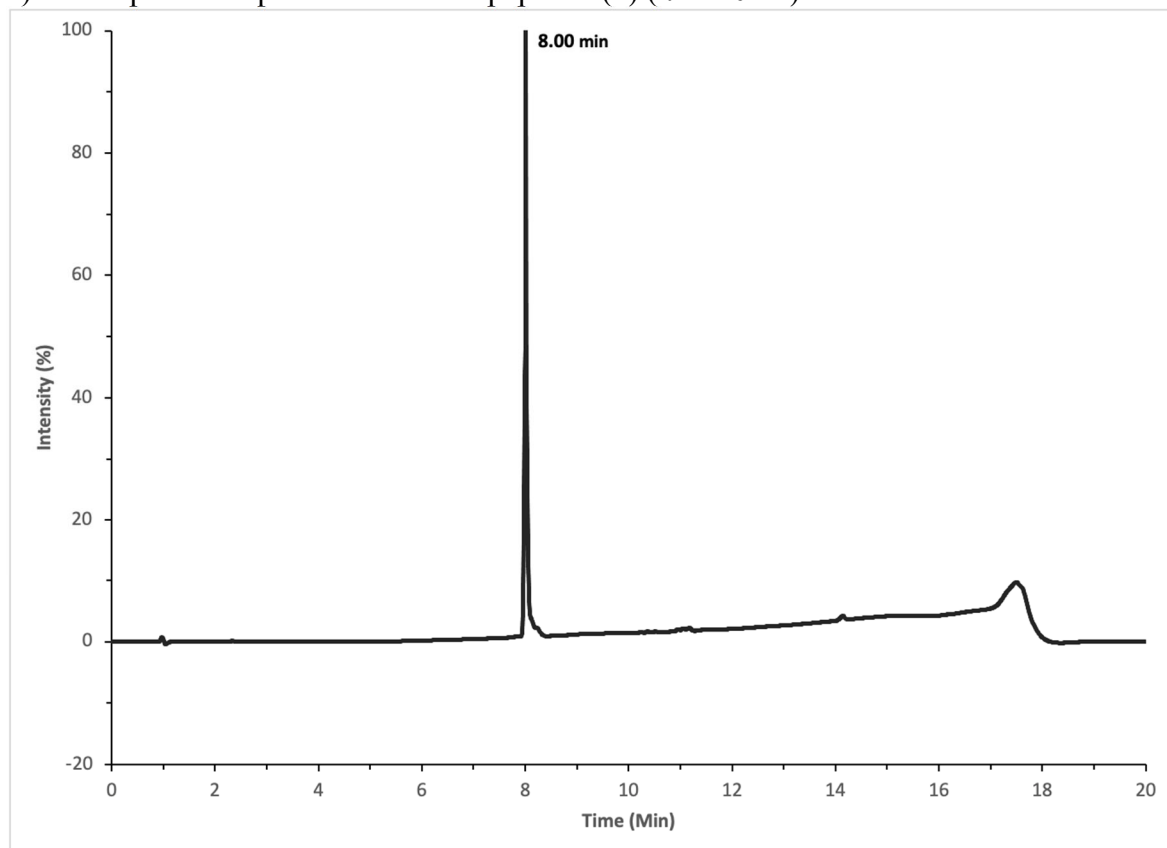

b)  $^1\text{H}$  NMR spectrum of anabaenopeptin F (1) in DMSO- $d_6$

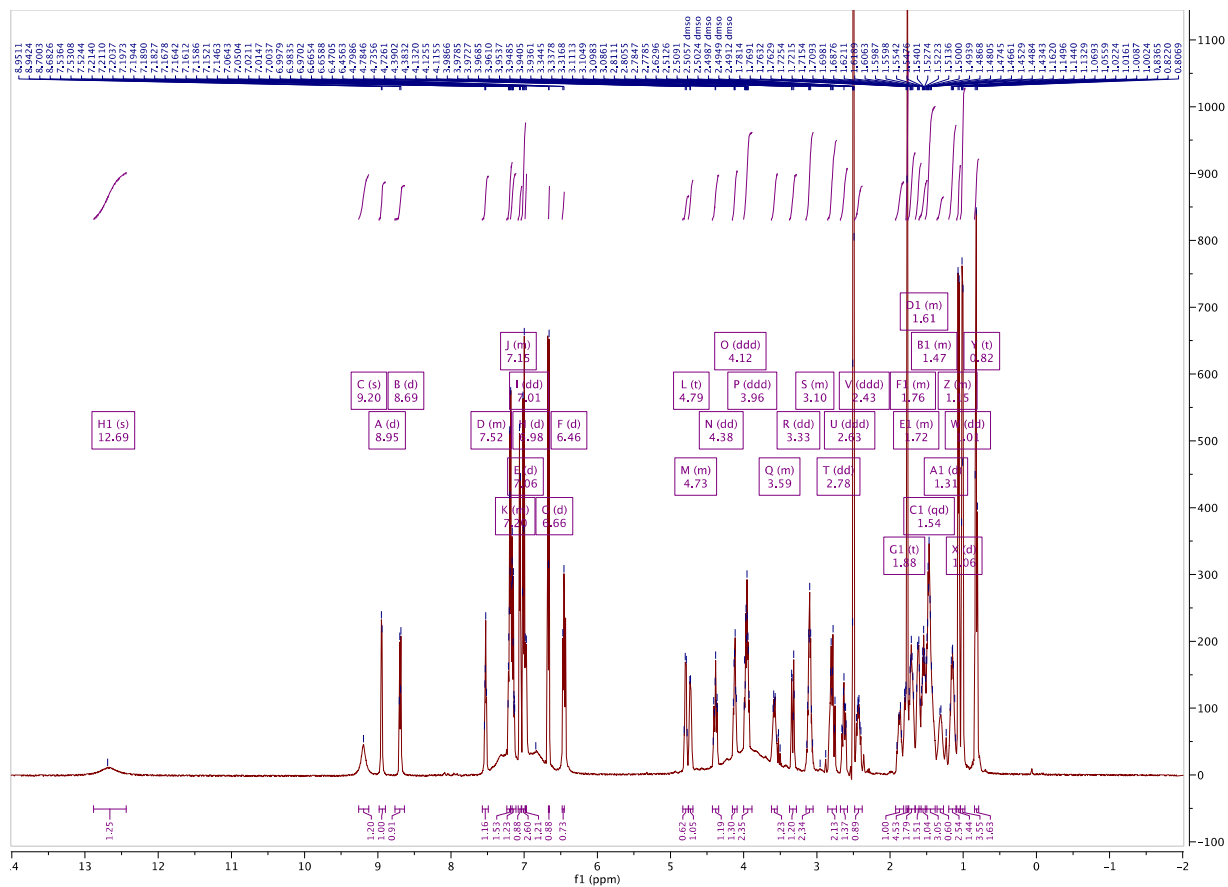

c)  $^{13}\text{C}$  NMR spectrum of anabaenopeptin F (**1**) in DMSO- $d_6$

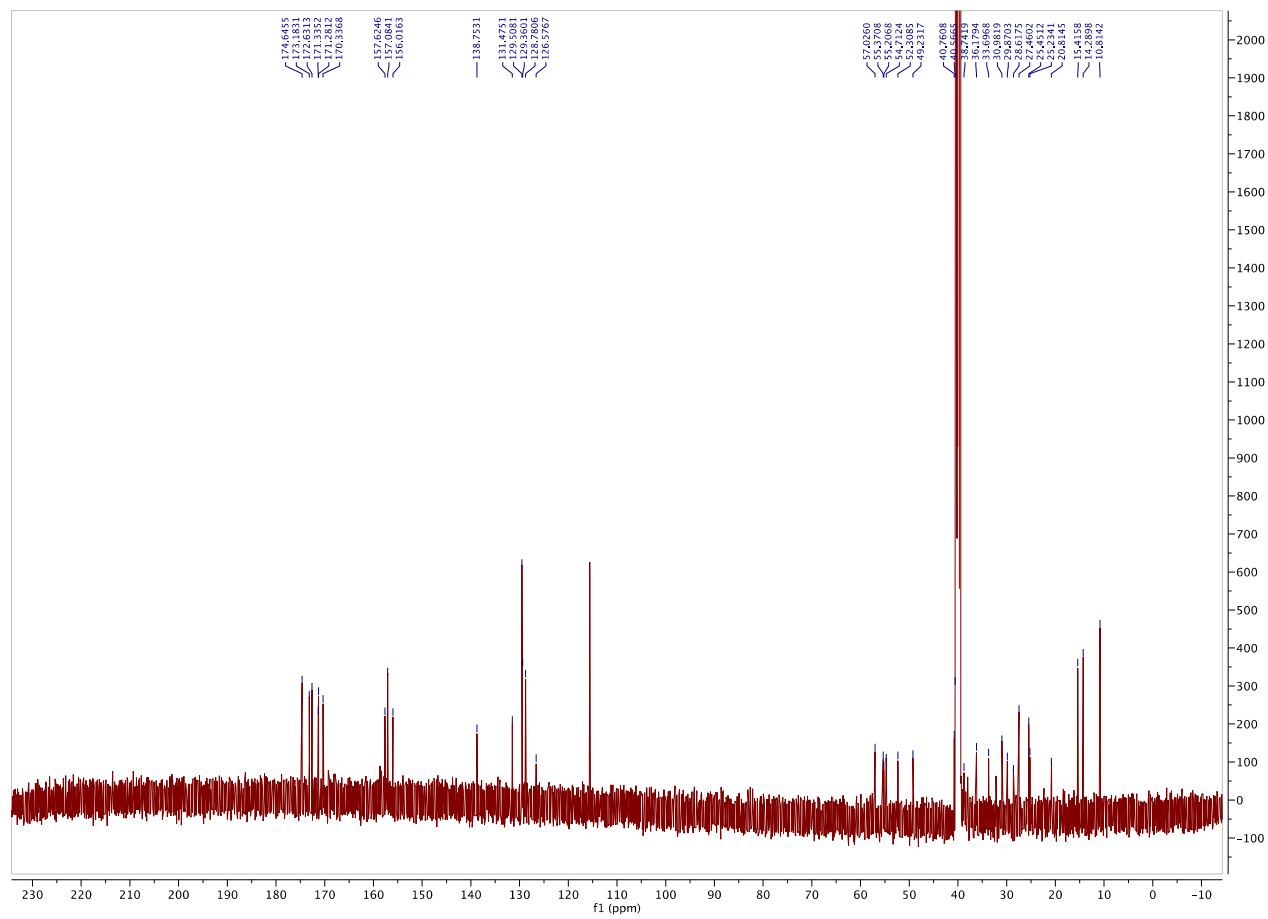

d)  $^1\text{H}$ - $^1\text{H}$  COSY spectrum of anabaenopeptin F (1) in DMSO- $d_6$

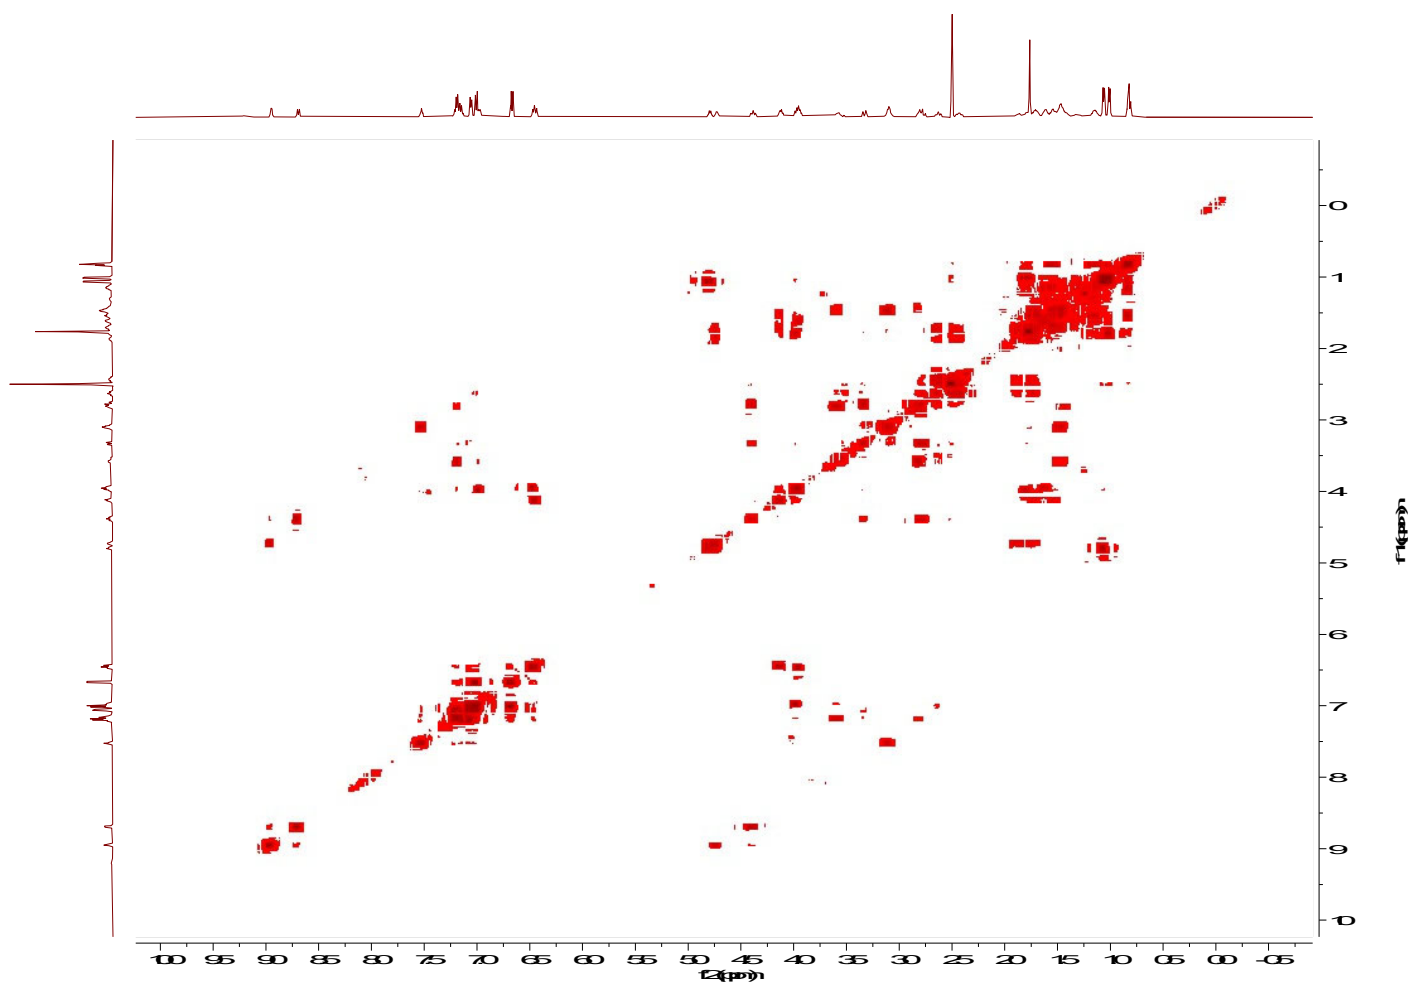

e) HSQC spectrum of anabaenopeptin F (1) in DMSO-d6

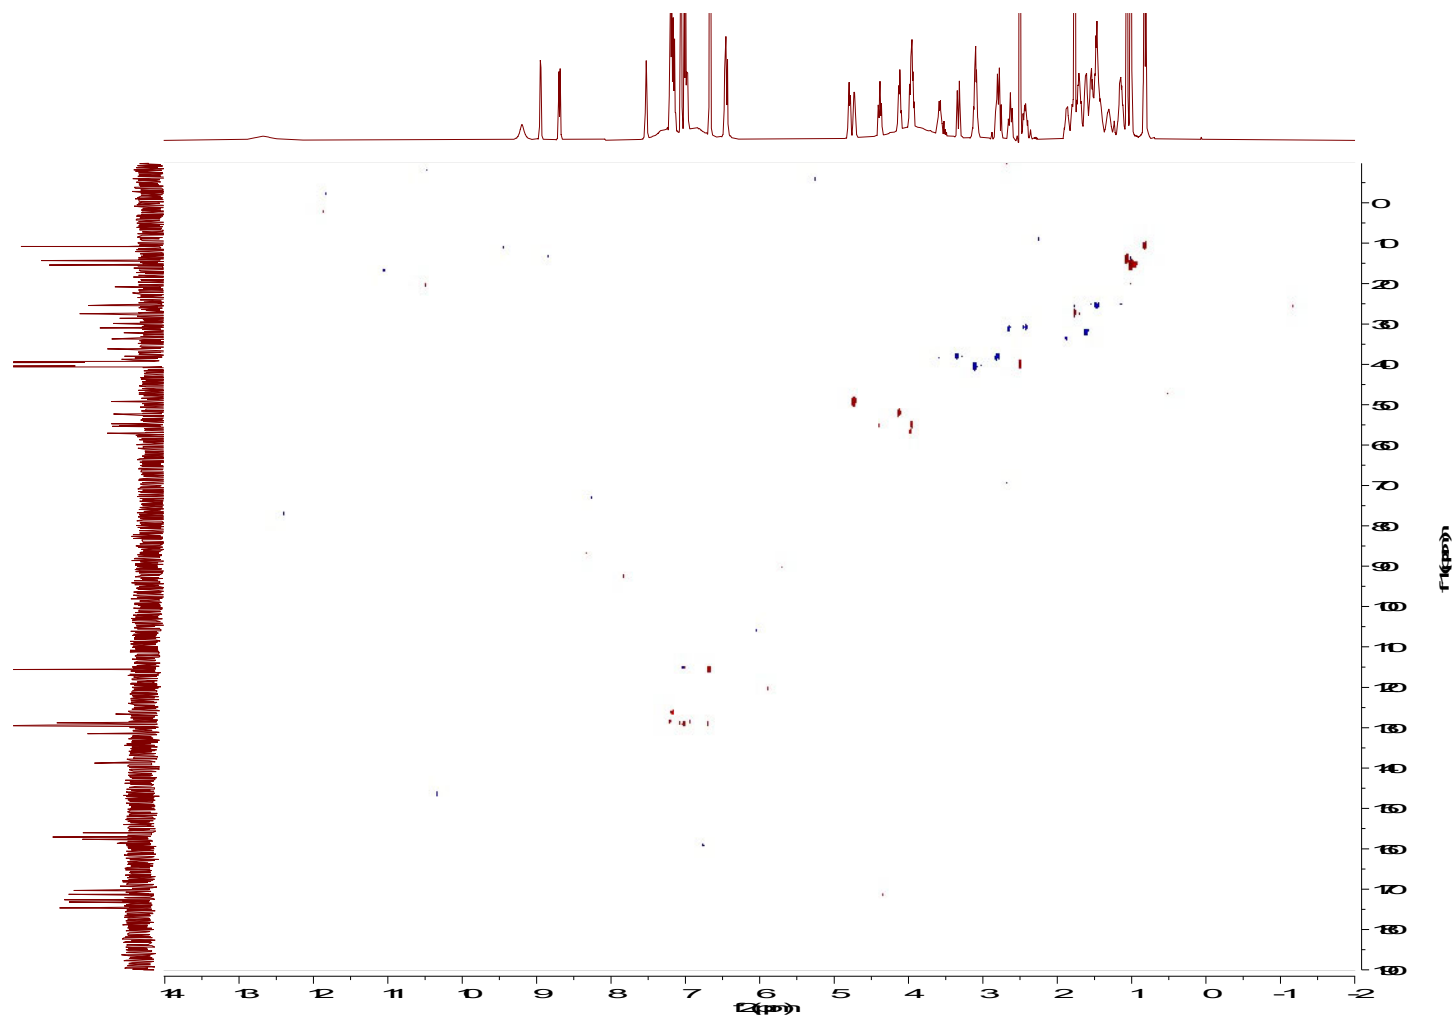

f) HRMS spectrum of anabaenopeptin F (1)

$[M + H]^+$  calculated mass for  $C_{42}H_{62}N_{10}O_9$ : 851.4744, found 851.4854.

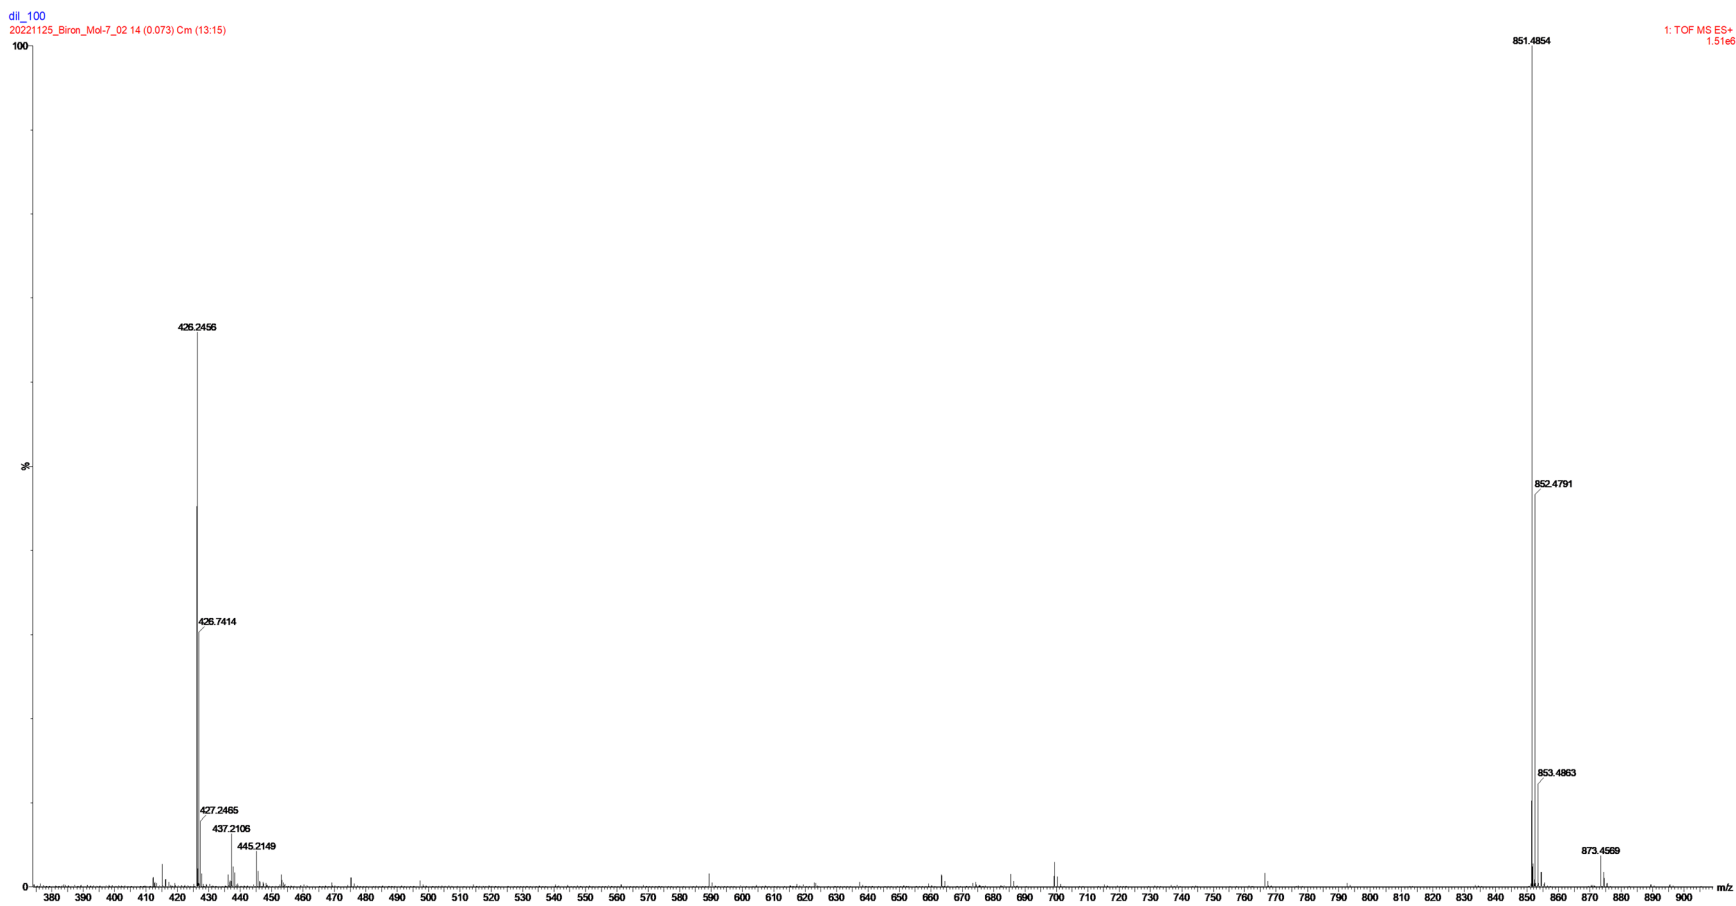

**Figure S2.** Characterization of (2*S*)-2-amino-4-bromobutanoic acid hydrobromide compounds (4).

a) IR spectrum of H-L-Hser(Br)-OH (4)

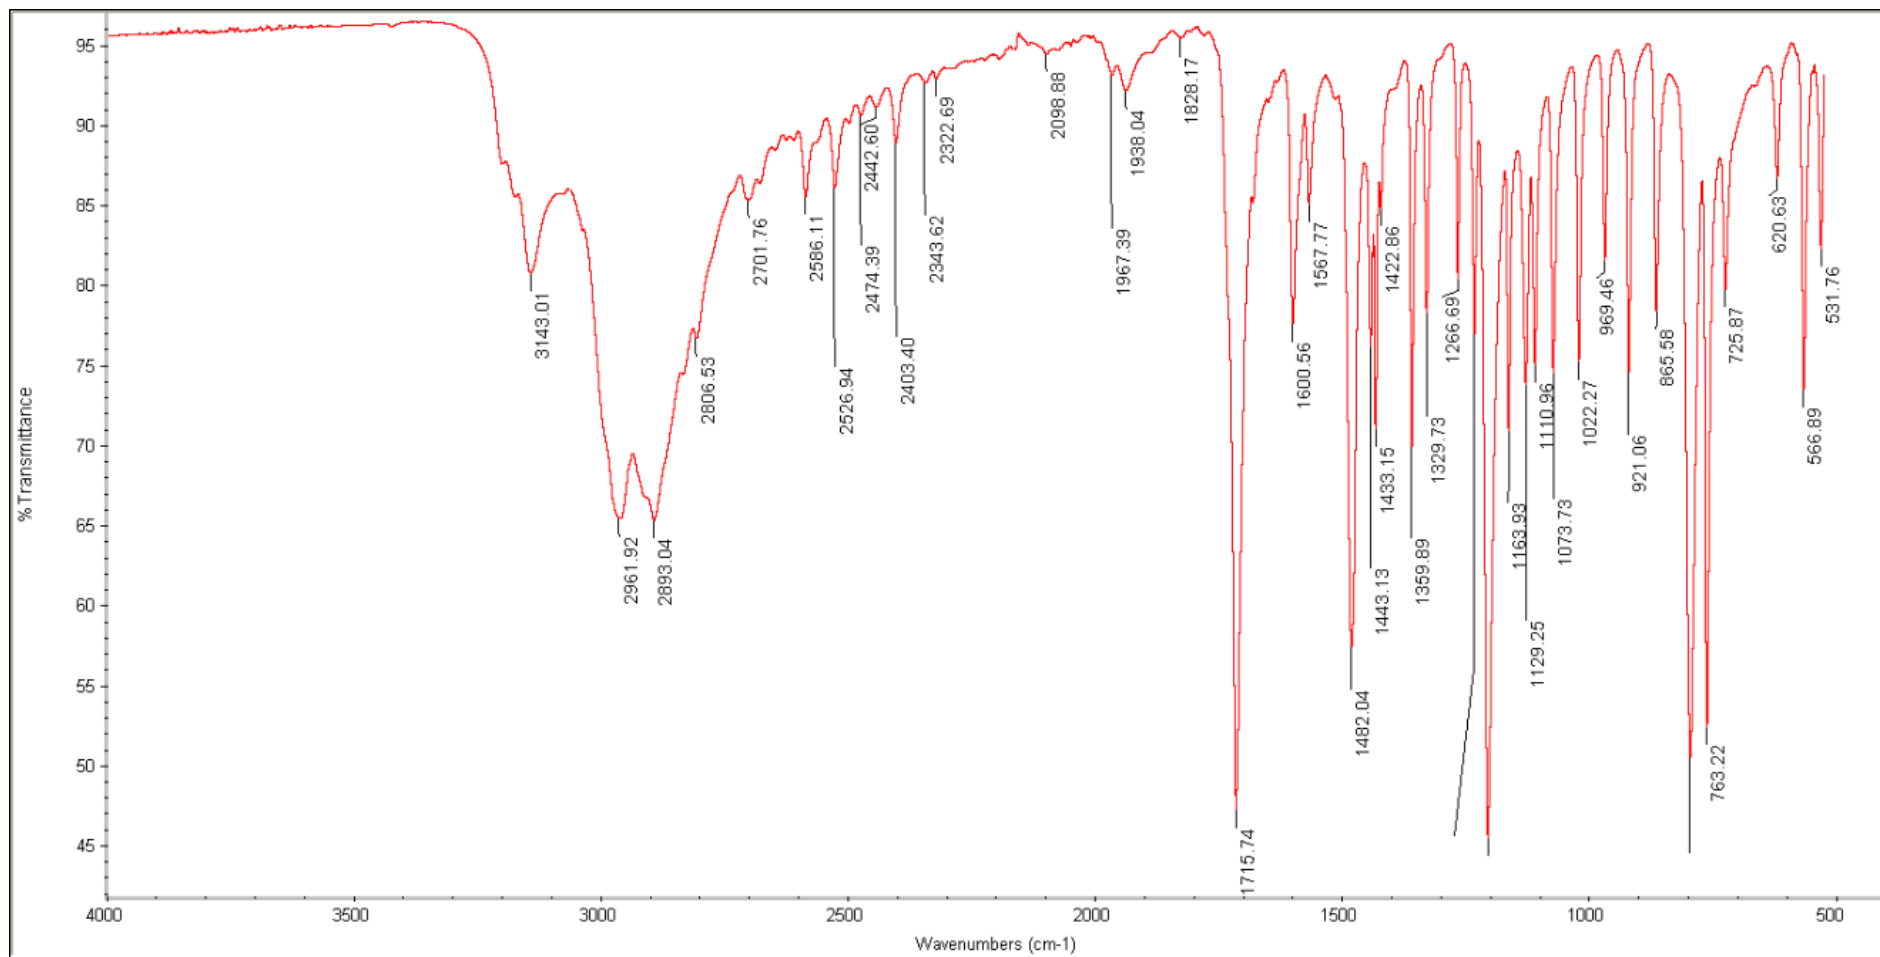



b)  $^1\text{H}$  NMR spectrum H-L-Hser(Br)-OH (**4**) in  $\text{CDCl}_3$

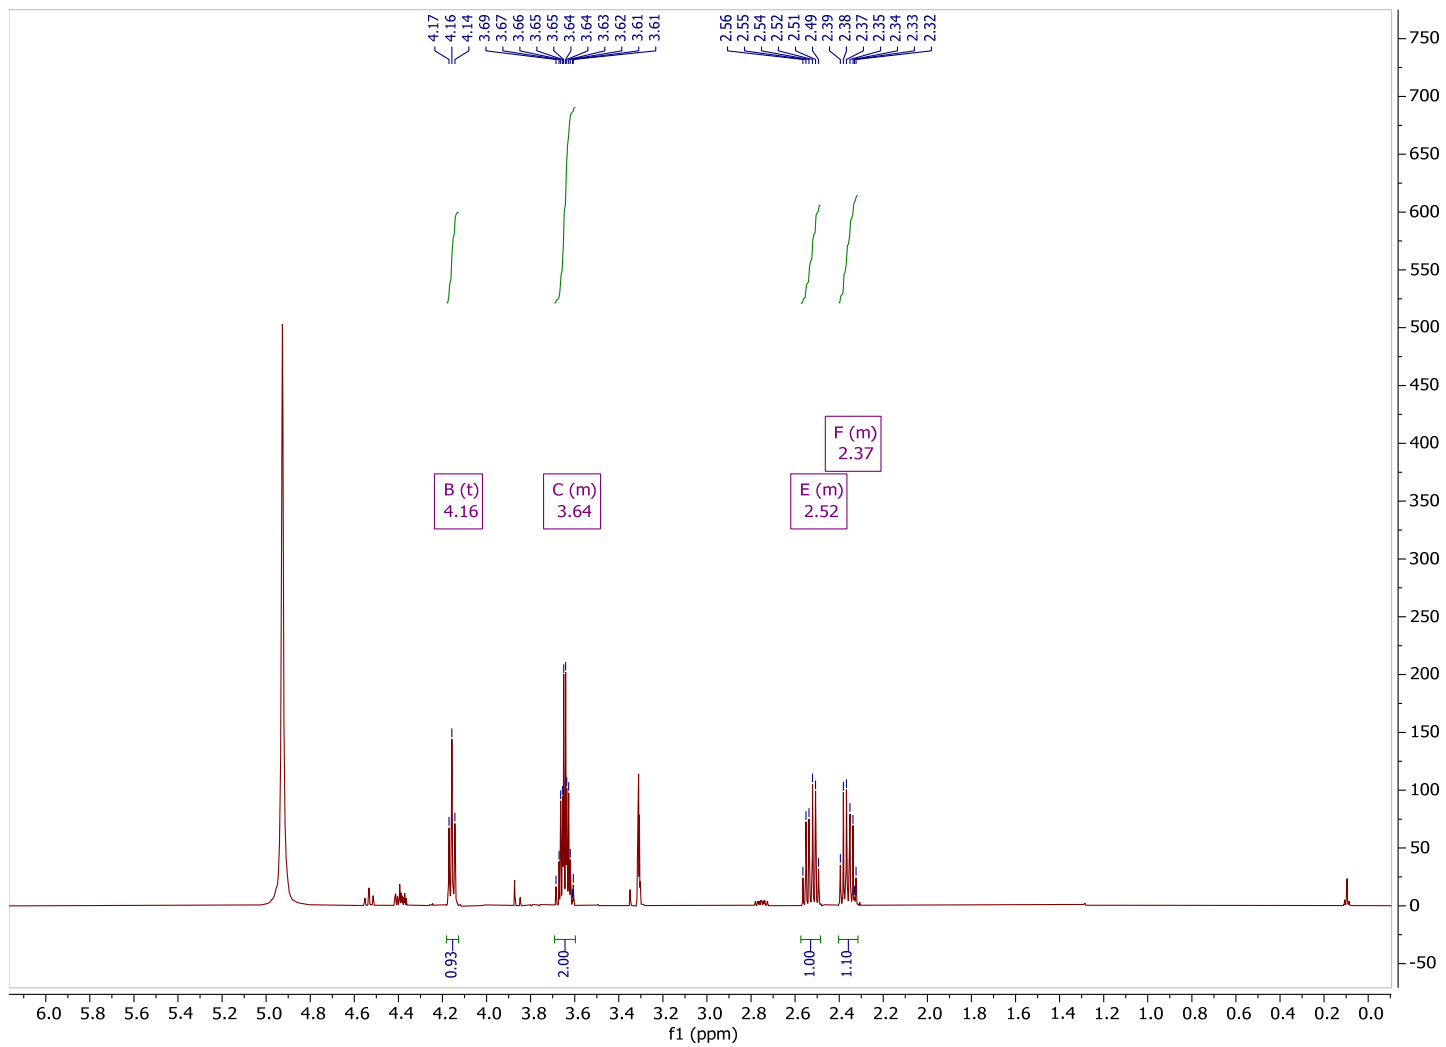

c)  $^{13}\text{C}$  NMR-APT spectrum H-L-Hser(Br)-OH (**4**) in  $\text{CDCl}_3$

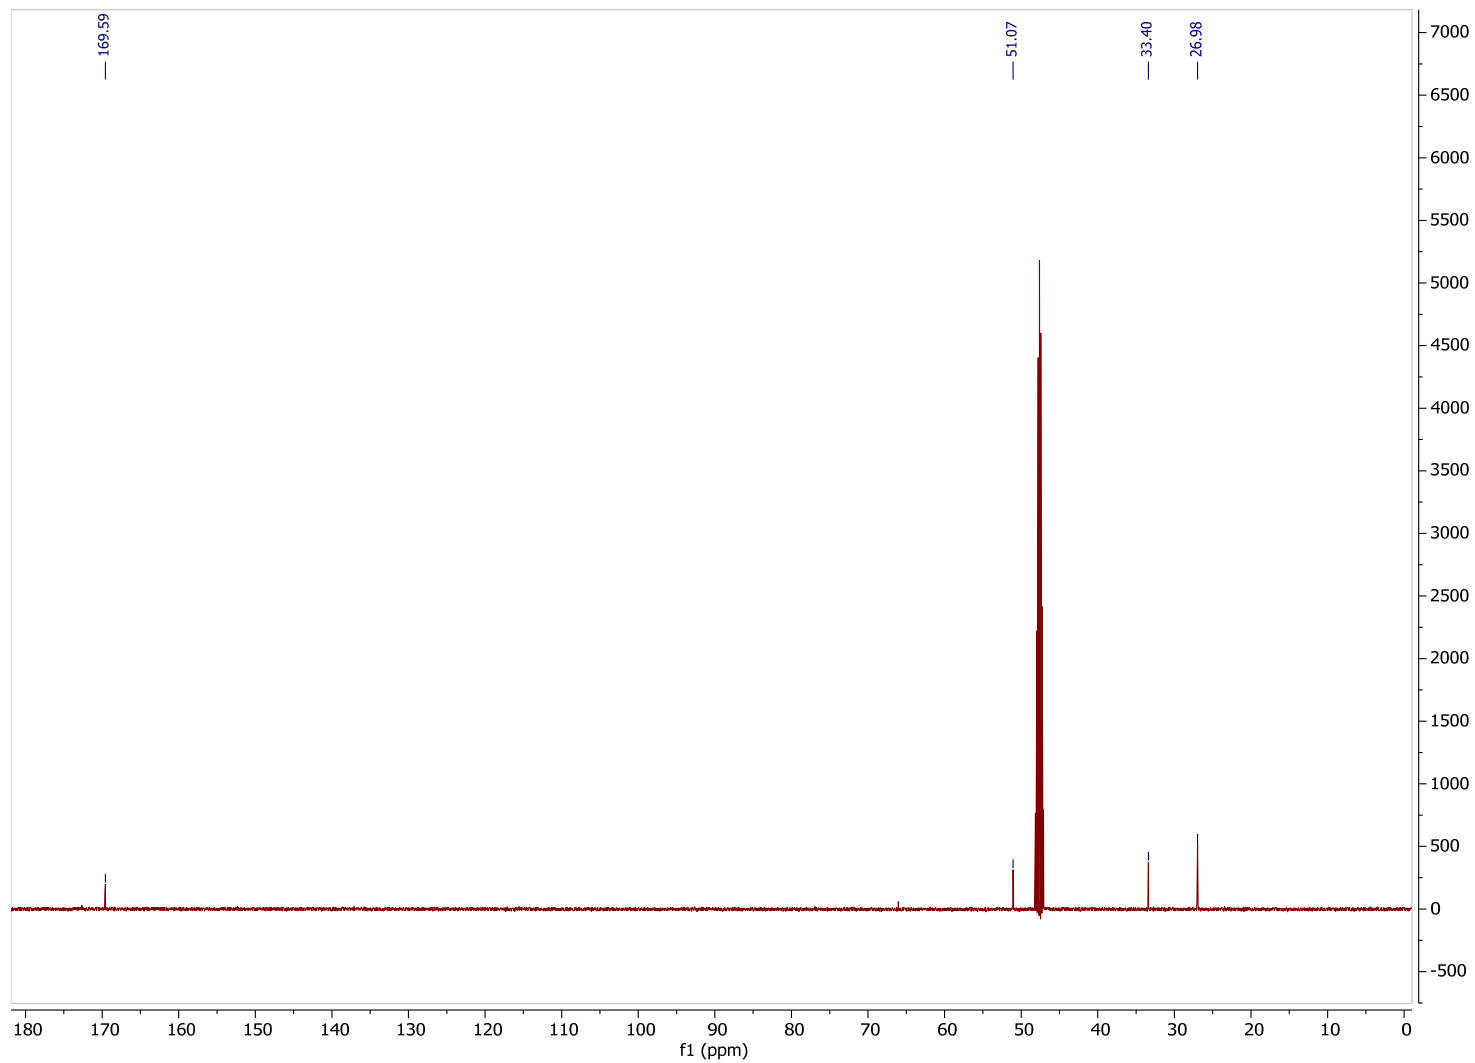

d) HRMS spectrum H-L-Hser(Br)-OH (4)

$[M+TFA-H]^+$  calculated for  $C_4H_9Br_2NO_2$ : 373.8856, found 373.6090.

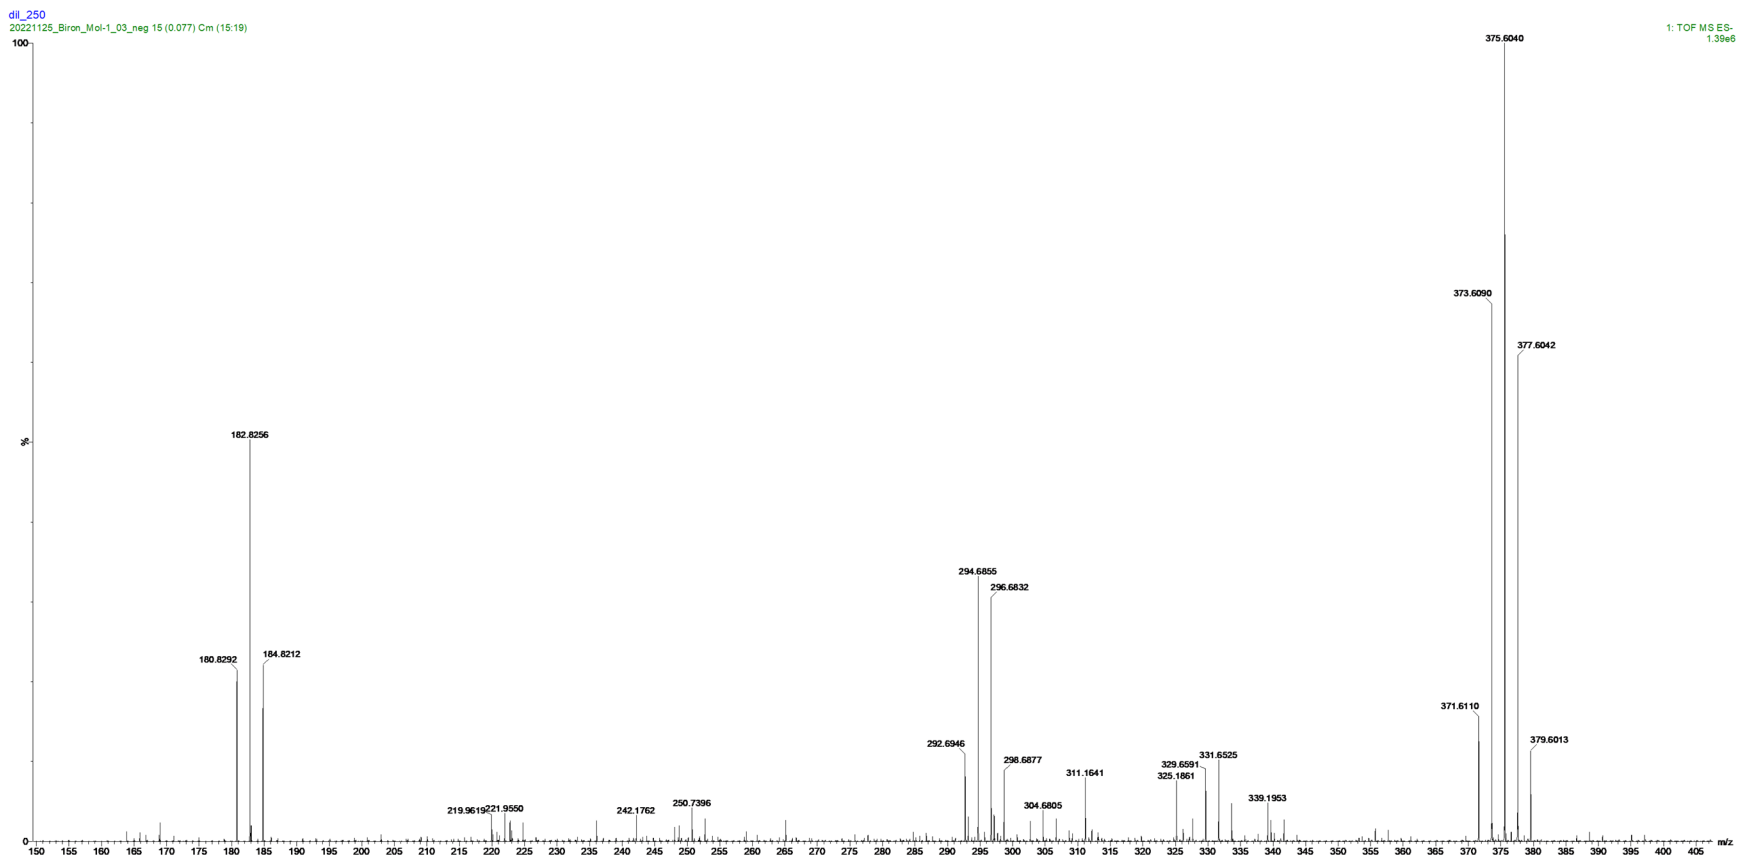

**Figure S3.** Characterization of methyl (2*S*)-4-bromo-2-([(9*H*-fluoren-9-ylmethoxy)carbonyl]amino)butanoate (**5**).

a) IR spectrum of Fmoc-L-Hser(Br)-OMe (**5**)

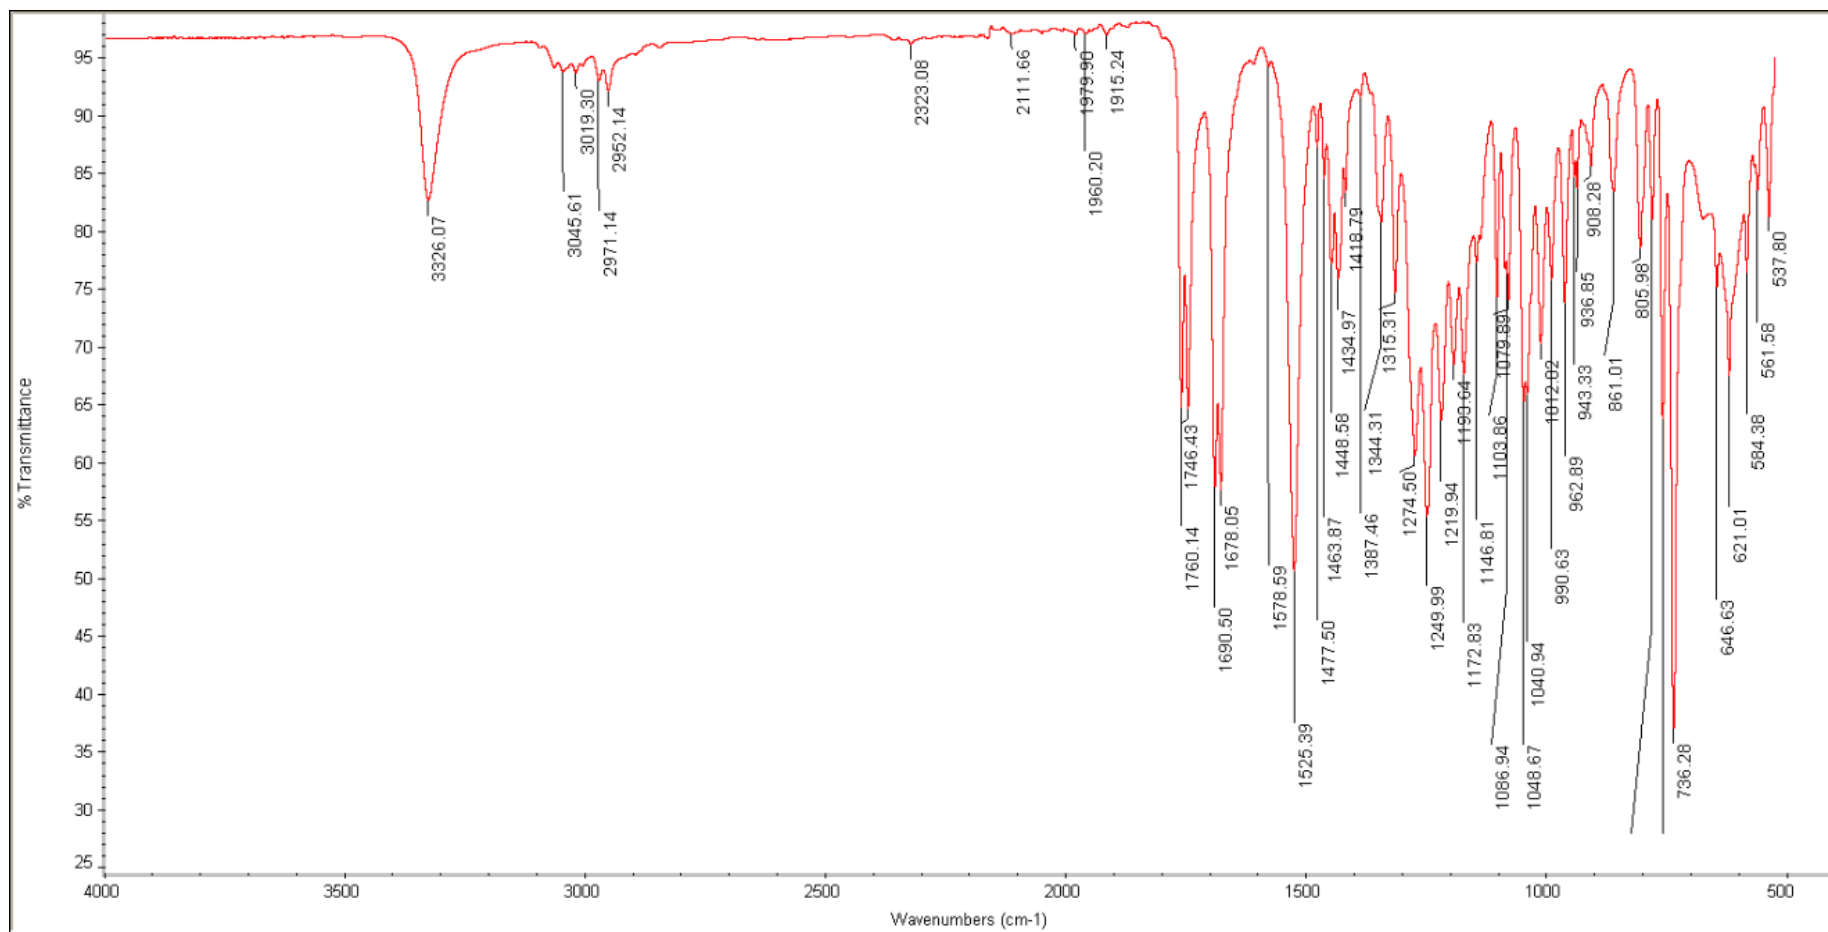

b)  $^1\text{H}$  NMR spectrum Fmoc-L-Hser(Br)-OMe (**5**) in  $\text{CDCl}_3$

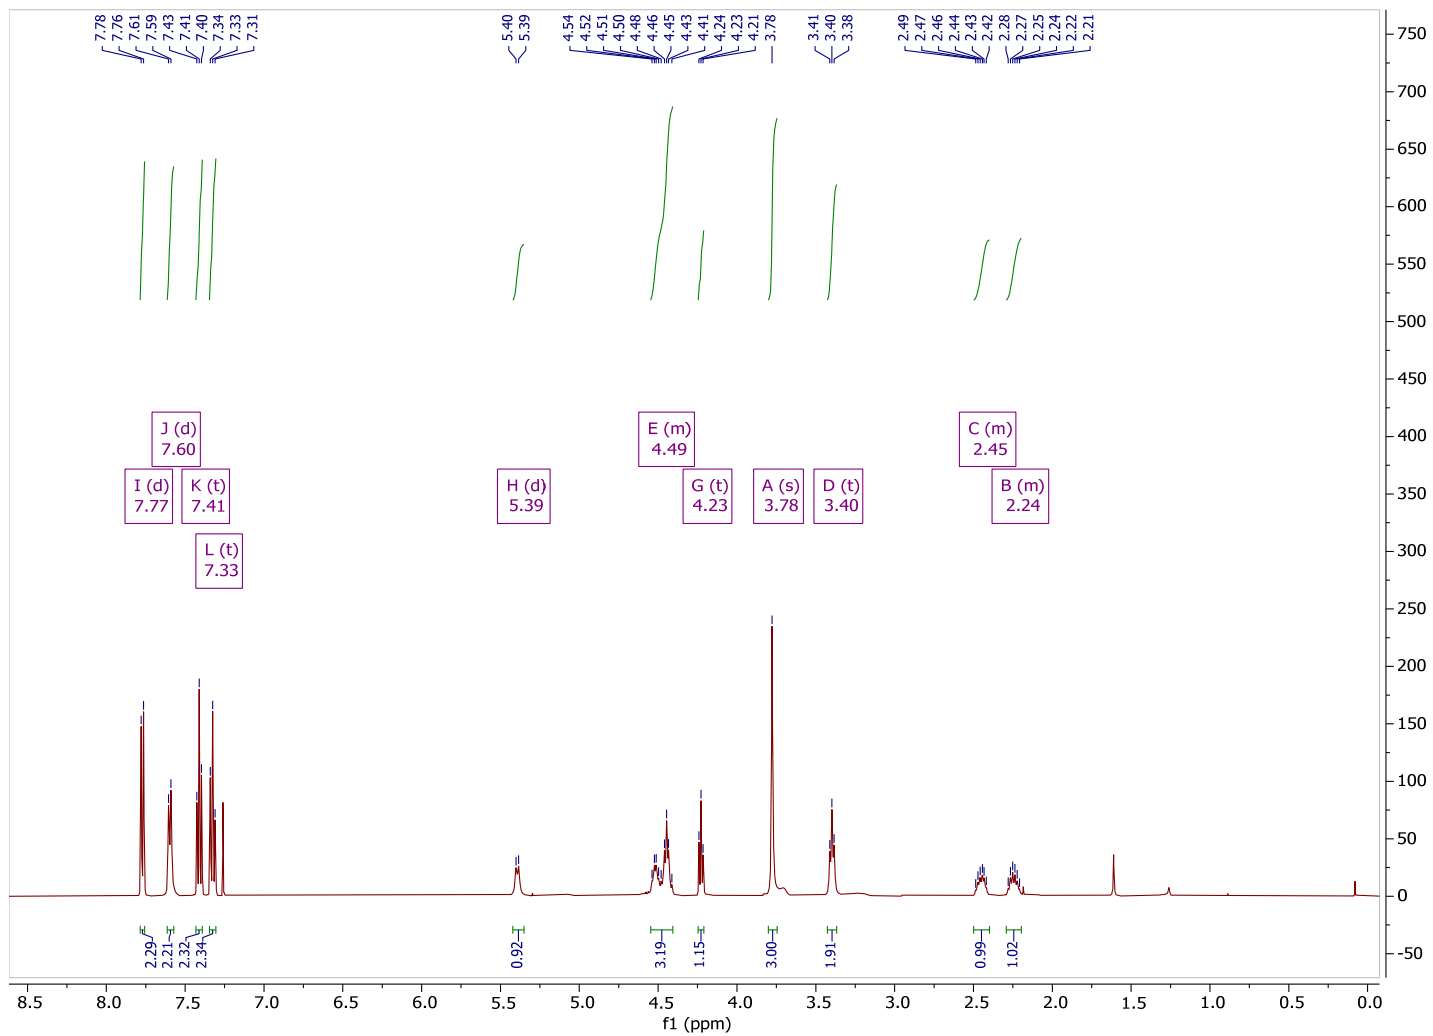

c)  $^{13}\text{C}$  NMR-APT spectrum Fmoc-L-Hser(Br)-OMe (**5**) in  $\text{CDCl}_3$

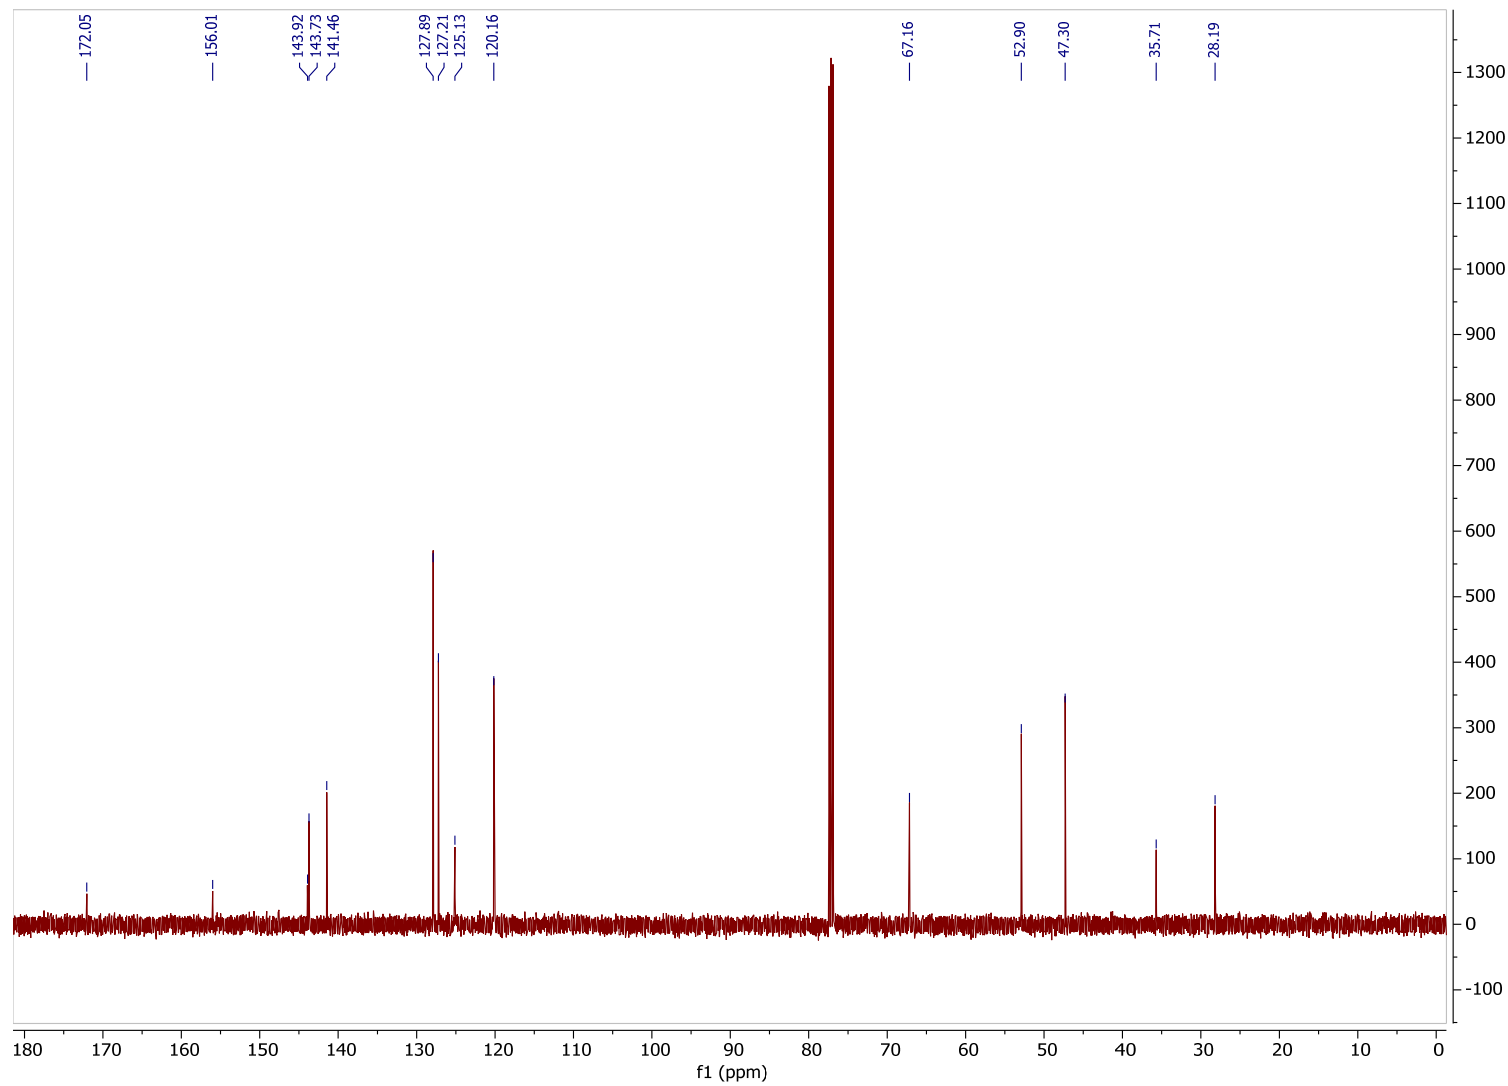

d) HRMS spectrum of Fmoc-L-Hser(Br)-OMe (**5**)

$[M + Na]^+$  calculated for  $C_{20}H_{20}BrNO_4Na$ : 440.0468, found 440.0446.

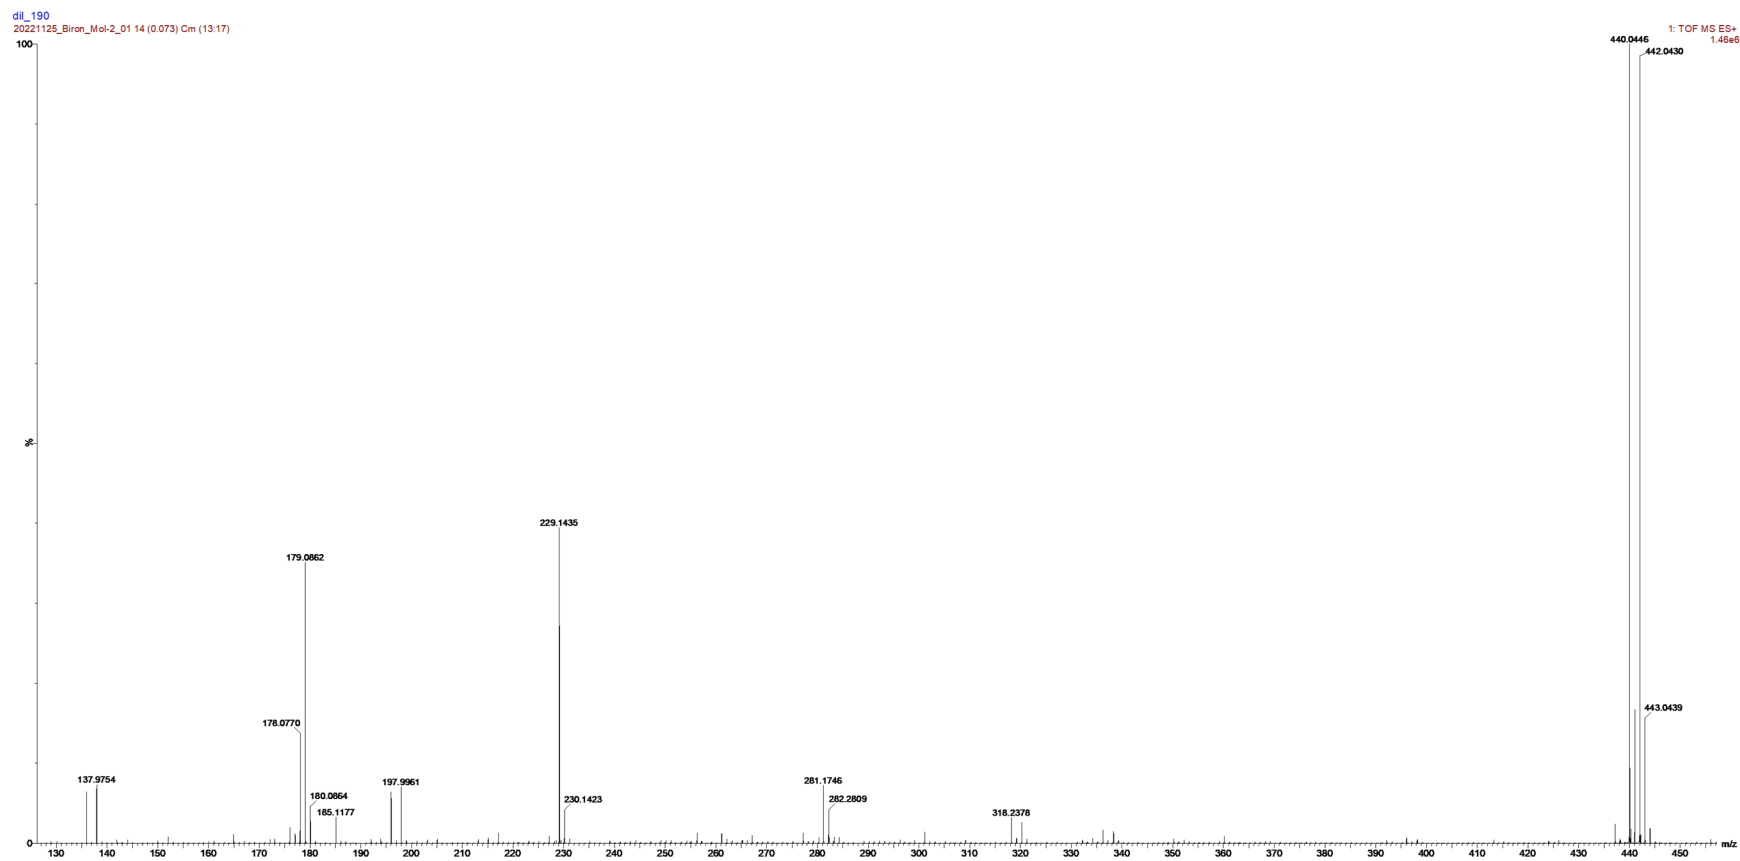

**Figure S4.** Characterization of 4-*tert*-butoxyphenyl bromide (**6**).

a)  $^1\text{H}$  NMR spectrum of 4-*tert*-butoxyphenyl bromide (**6**) in  $\text{CDCl}_3$

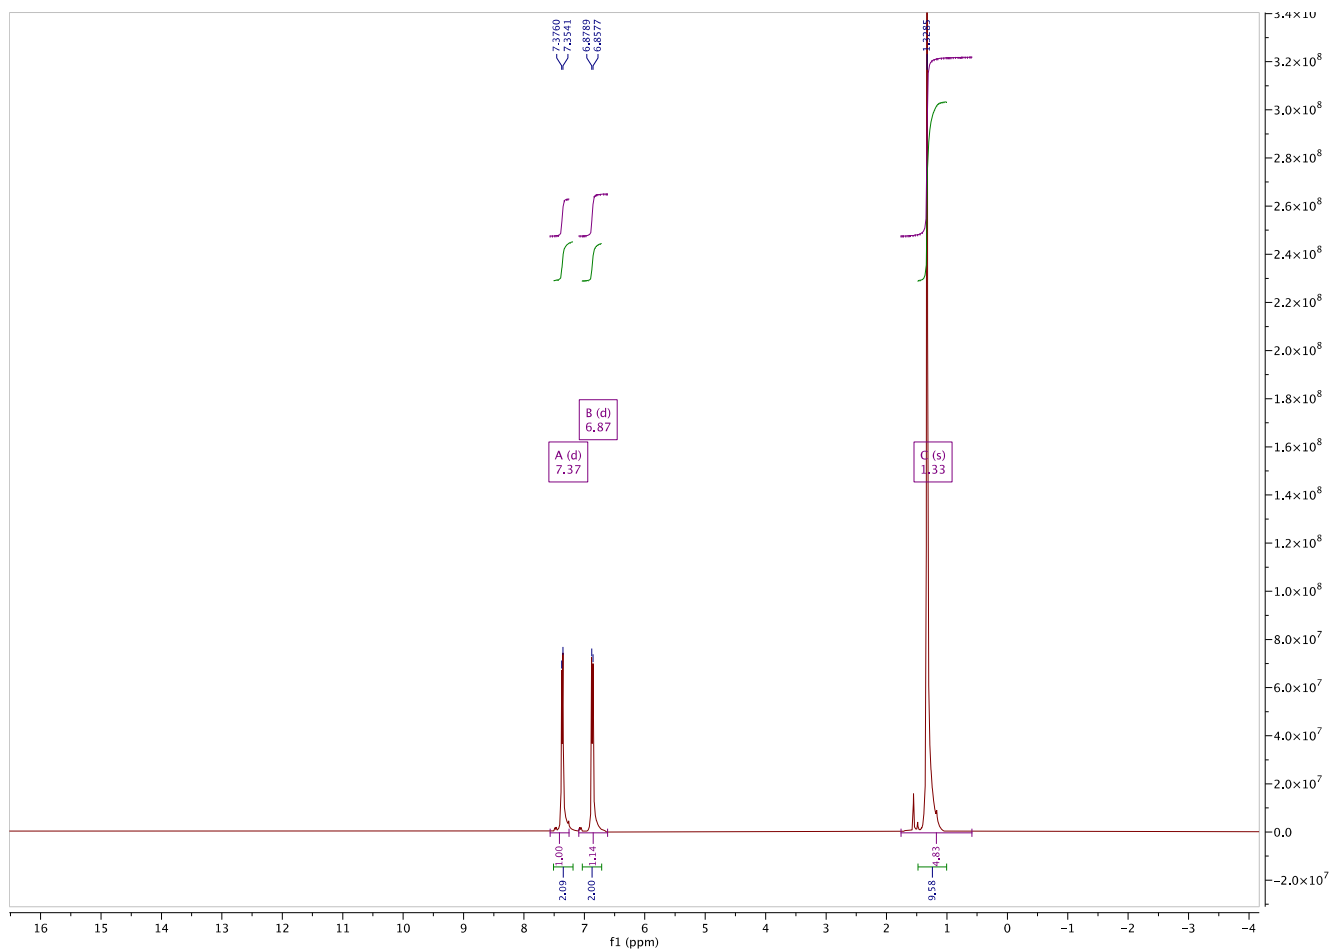



b)  $^{13}\text{C}$  NMR-APT spectrum of 4-*tert*-butoxyphenyl bromide (**6**) in  $\text{CDCl}_3$

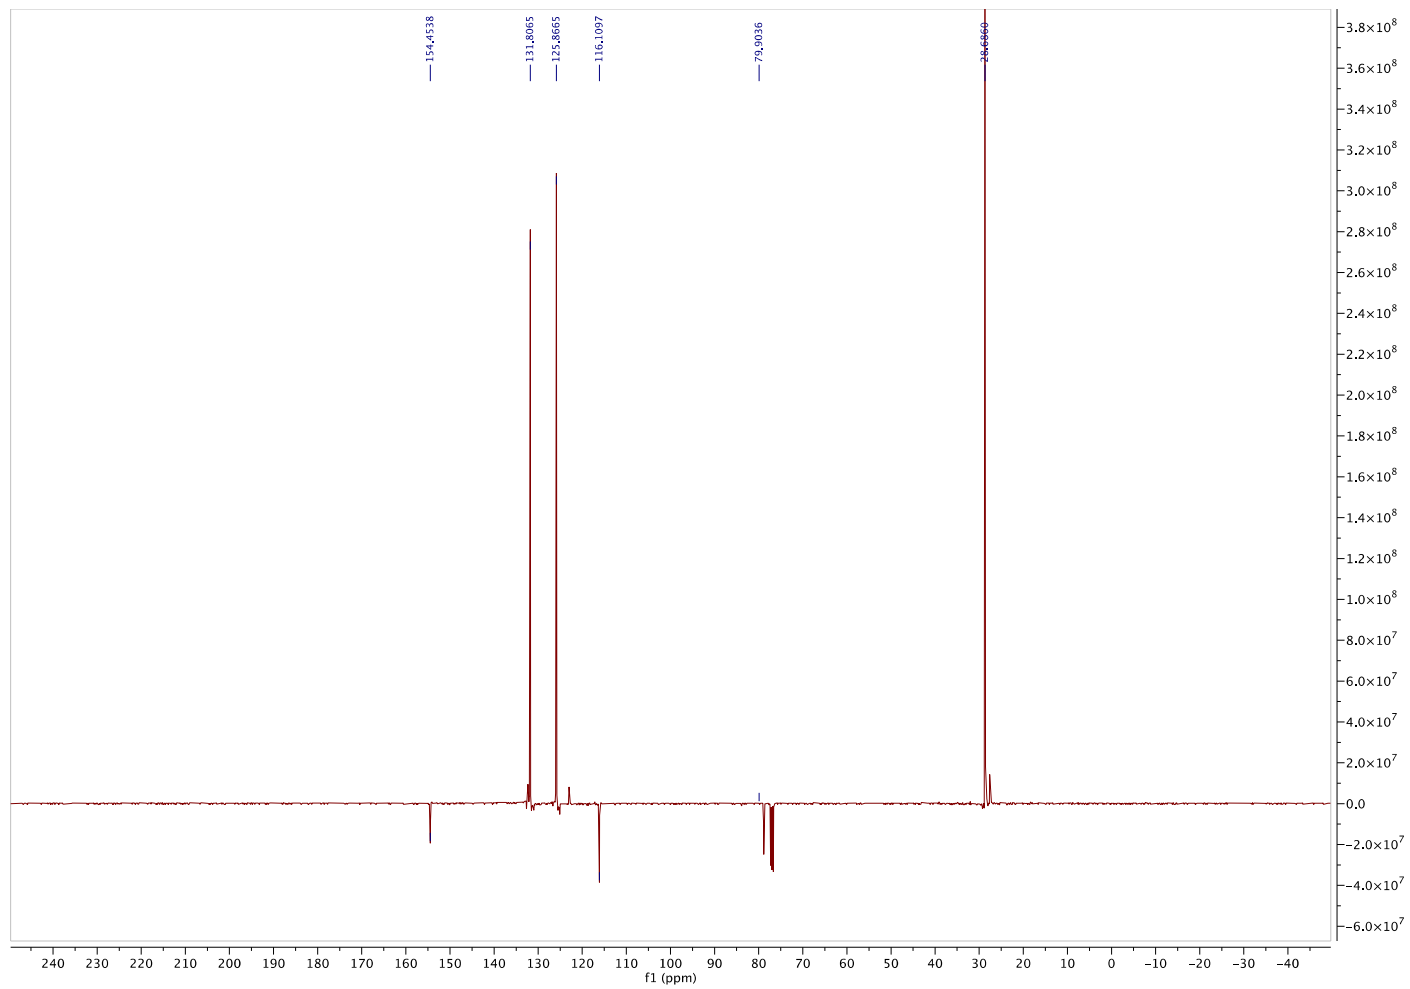

**Figure S5.** Characterization of methyl (2*S*)-4-(4-*tert*-butoxyphenyl)-2-([(9*H*-fluoren-9-ylmethoxy)carbonyl]amino)butanoate (Fmoc-L-Htyr(OtBu)-OMe) (**7**).

a) IR spectrum of Fmoc-L-Htyr(OtBu)-OMe (**7**)

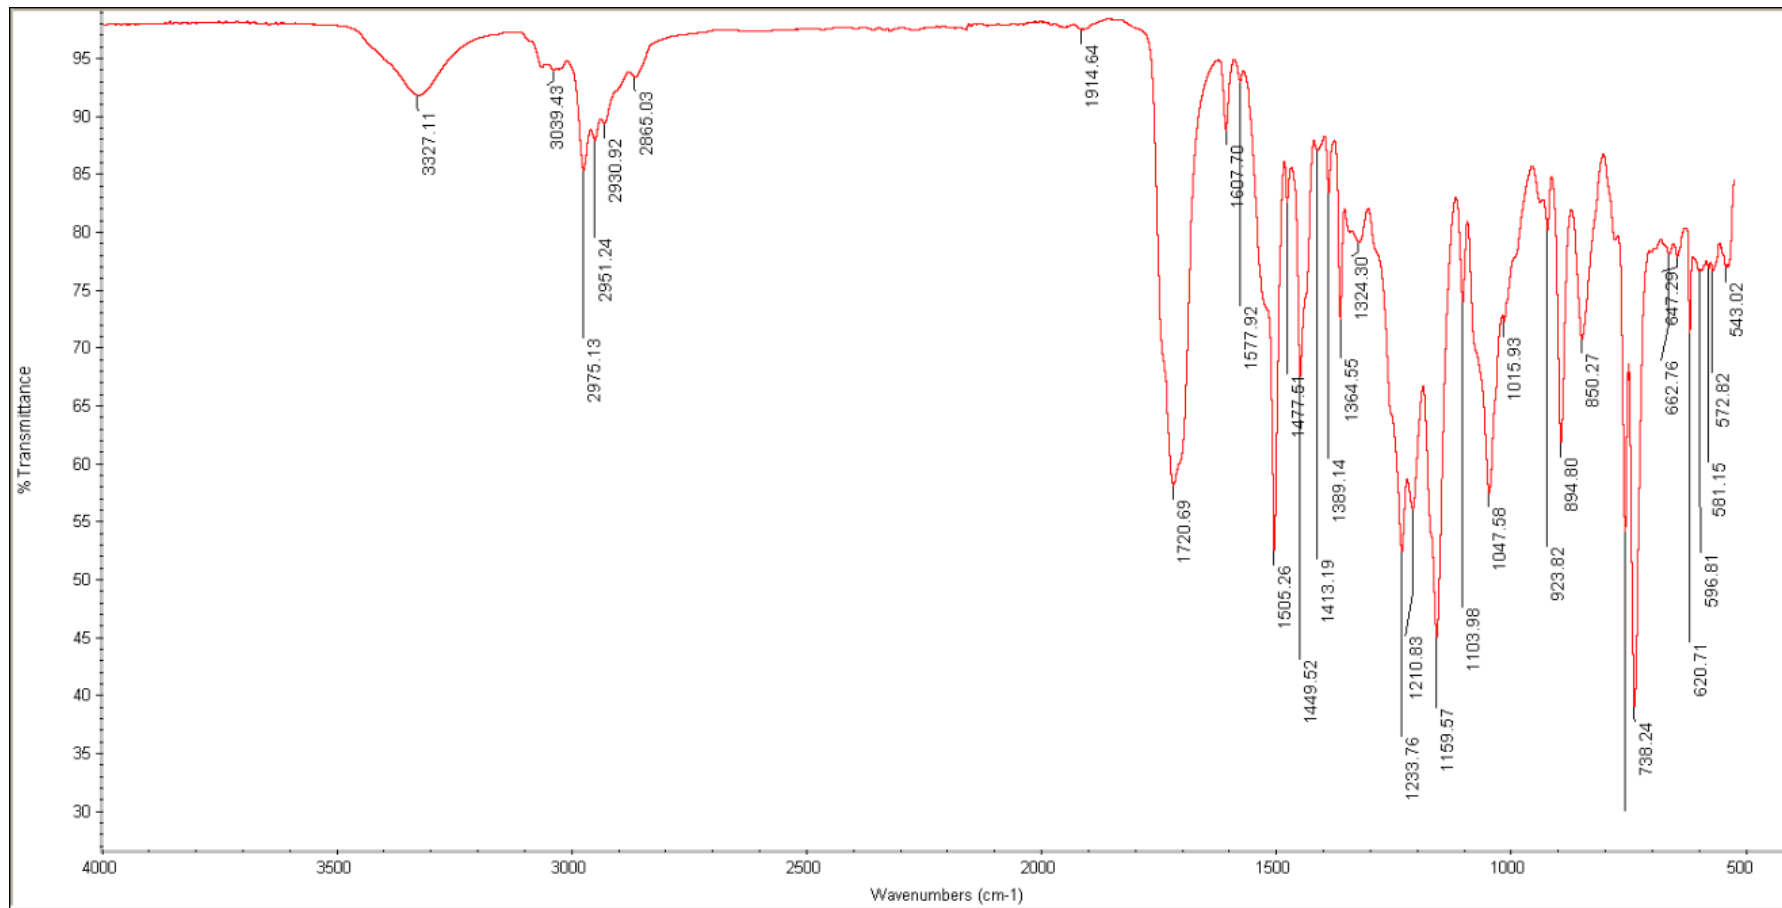

b)  $^1\text{H}$  NMR spectrum of Fmoc-L-Htyr(OtBu)-OMe (**7**) in  $\text{CDCl}_3$

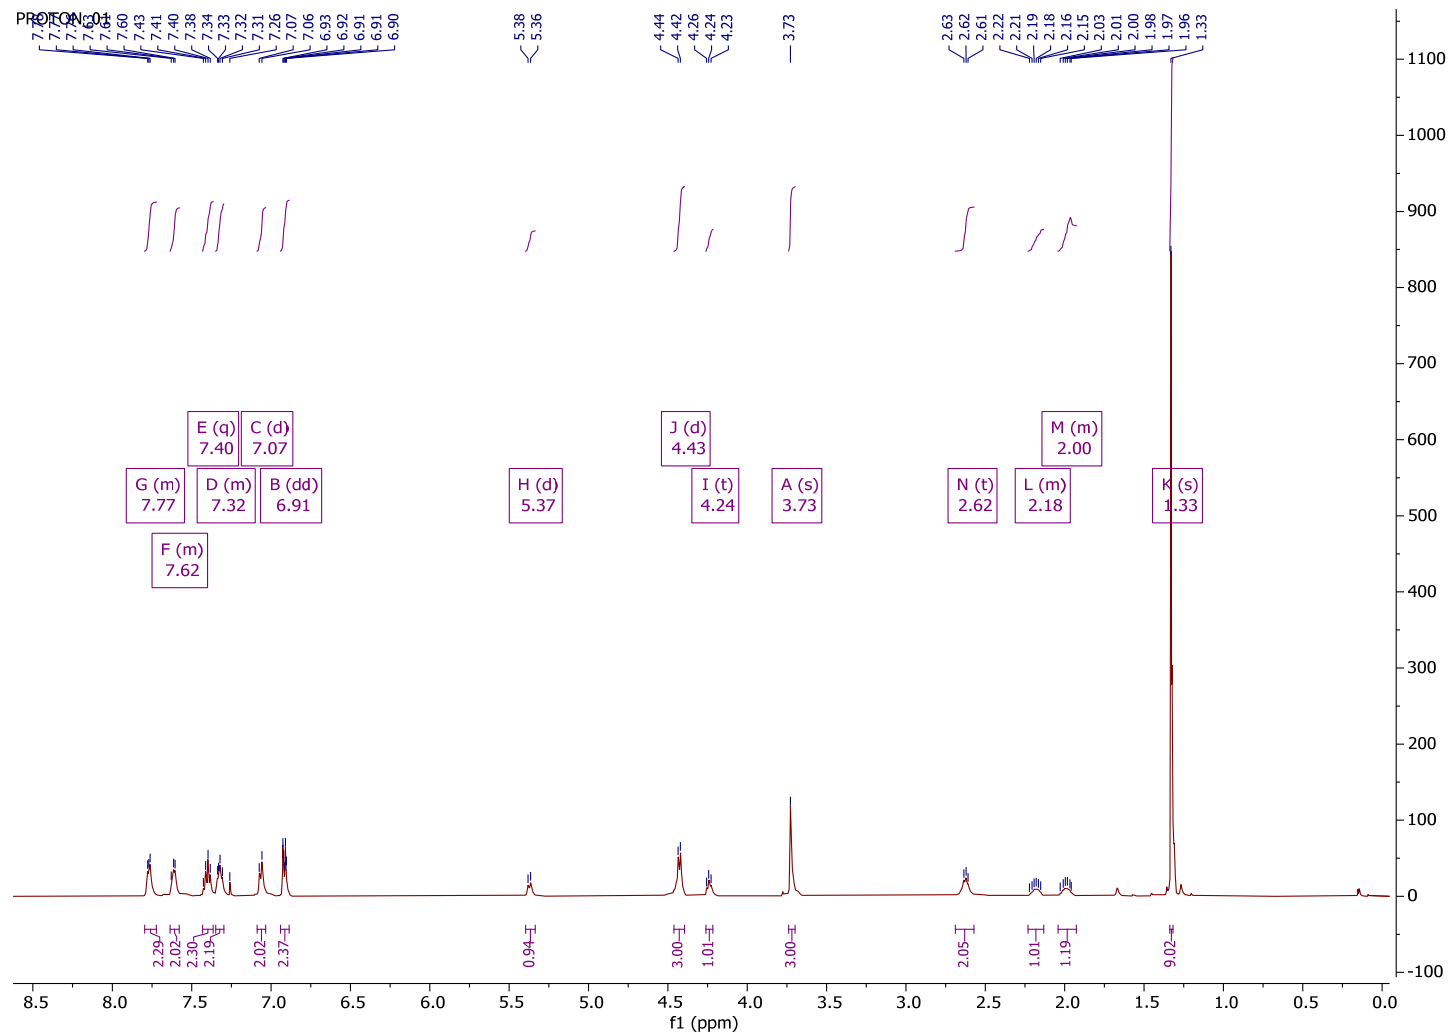

c)  $^{13}\text{C}$  NMR-APT spectrum of Fmoc-L-Htyr(OtBu)-OMe (7) in  $\text{CDCl}_3$

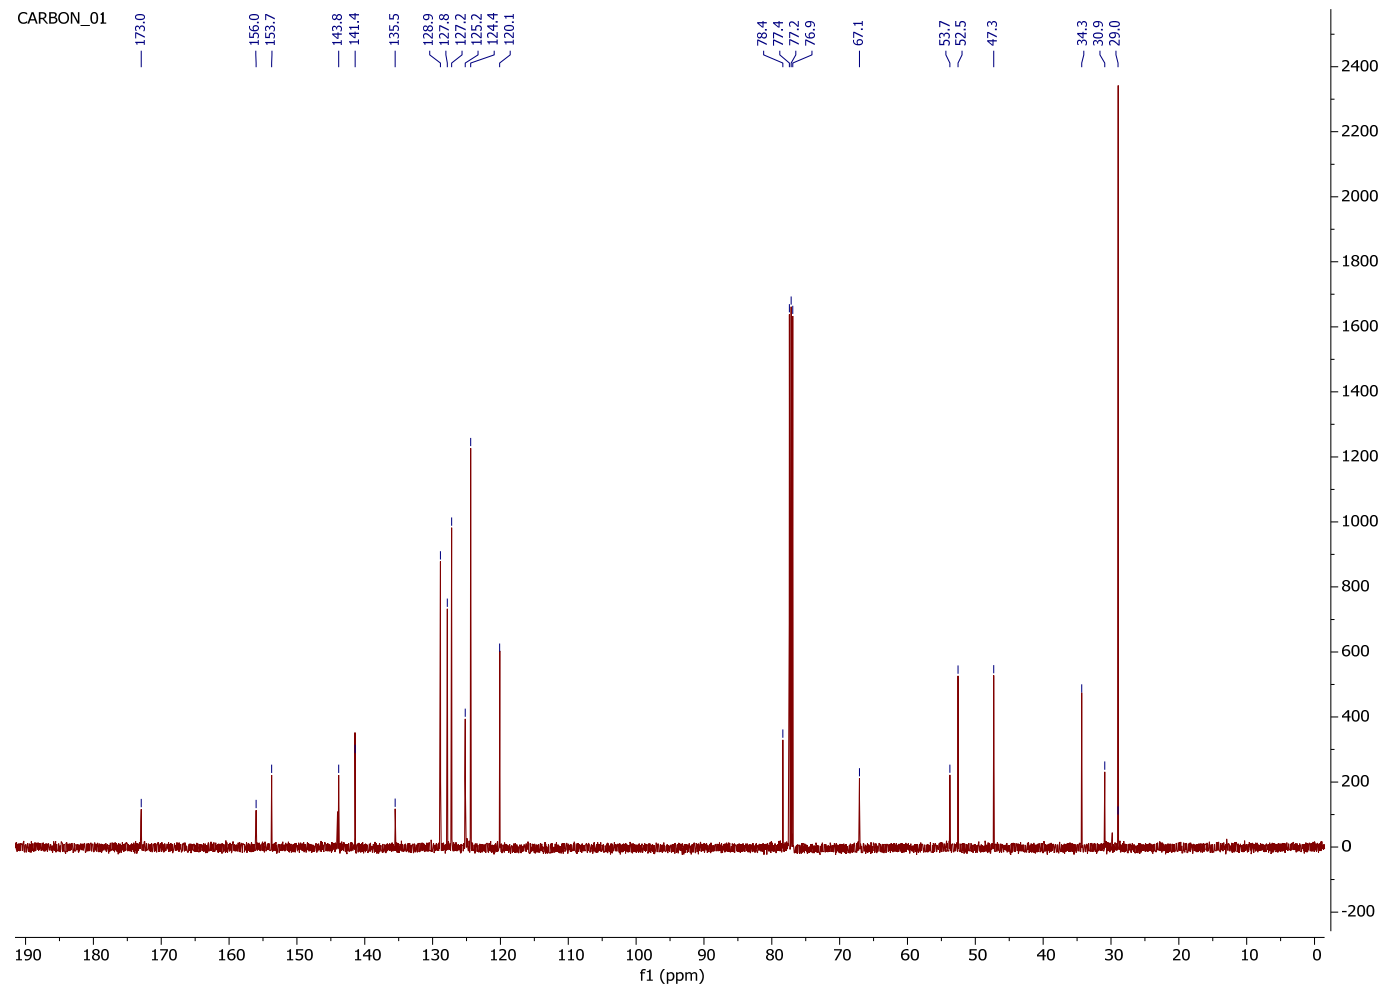

d) HRMS spectrum of Fmoc-L-Htyr(OtBu)-OMe (7)

$[M + Na]^+$  calculated for  $C_{30}H_{33}NO_5Na$  : 510.2256, found 510.2247.

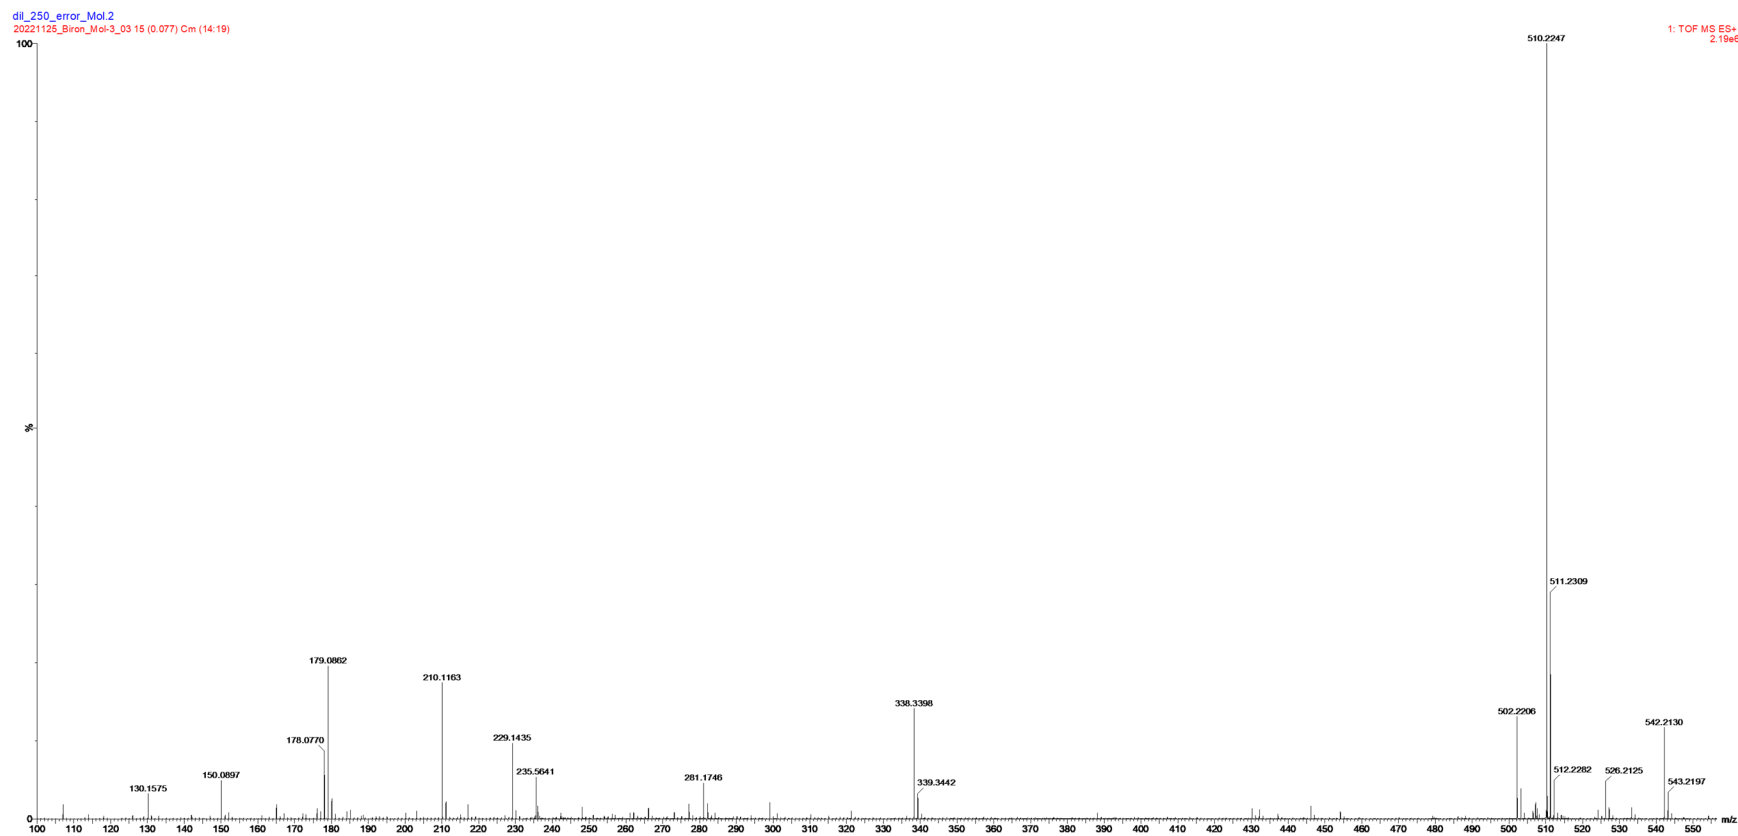

**Figure S6.** Characterization of (2S)-4-(4-tert-butoxyphenyl)-2-([(9H-fluoren-9-ylmethoxy)carbonyl]amino)butanoic acid (Fmoc-L-Htyr(OtBu)-OH) (**8**).

a) IR spectrum of Fmoc-L-Htyr(OtBu)-OH (**8**)

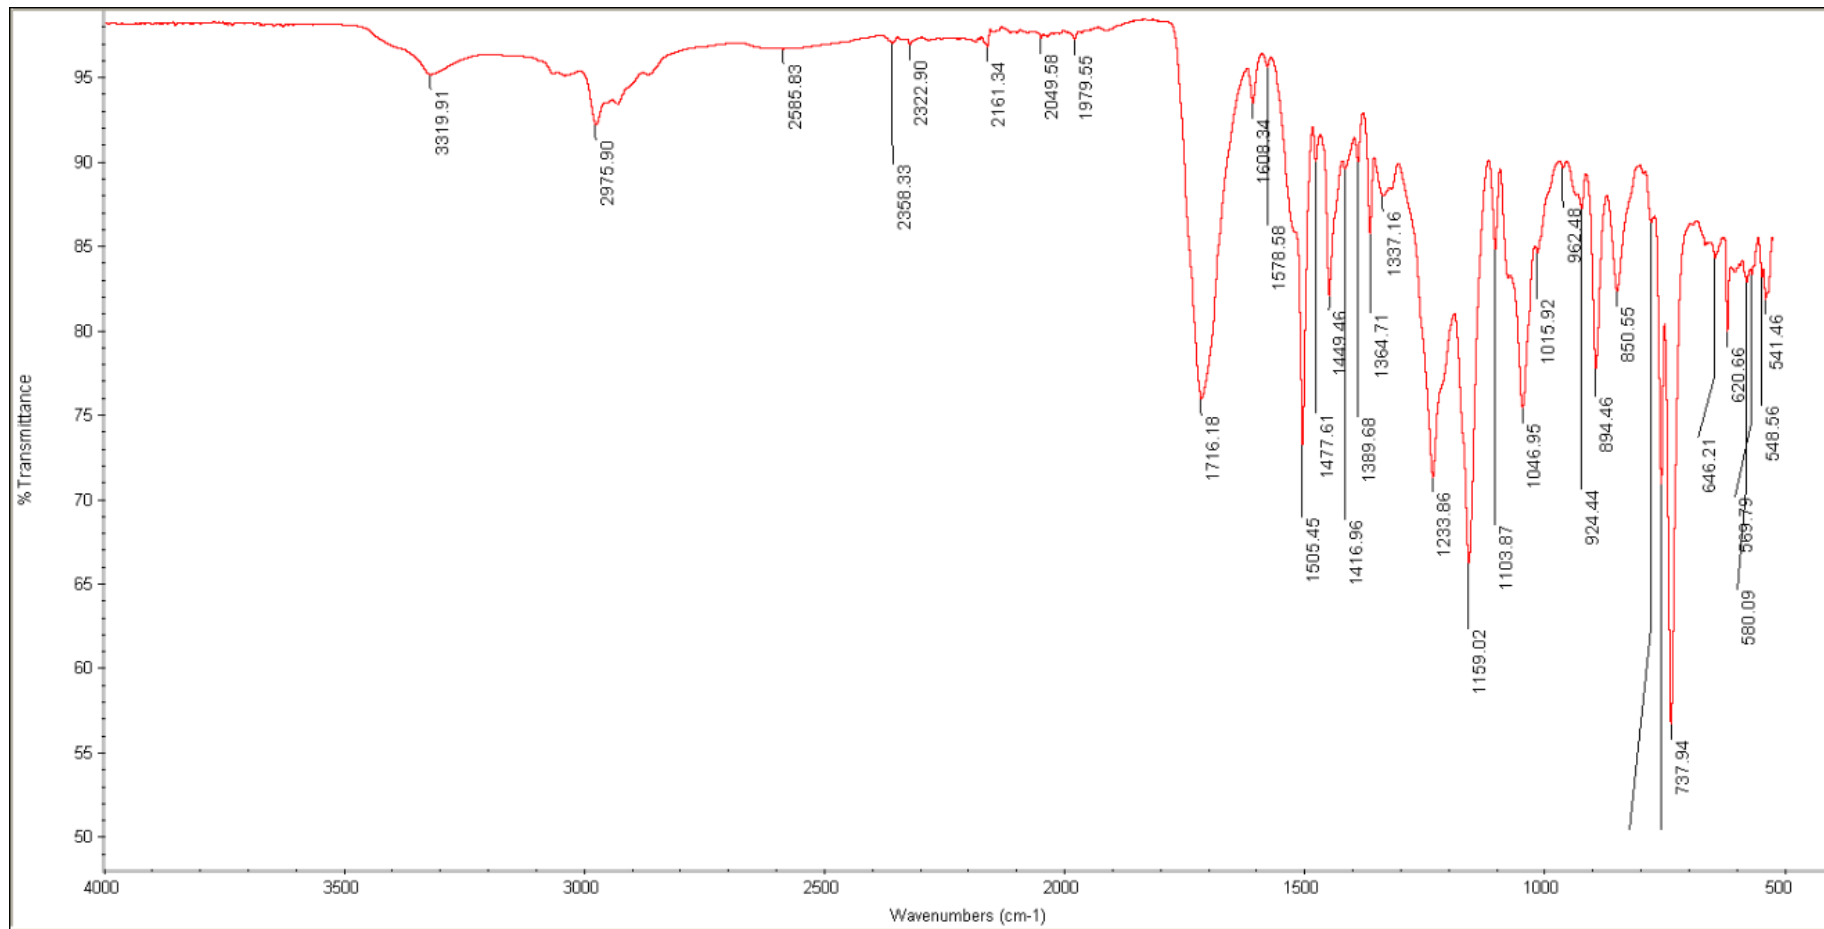

b)  $^1\text{H}$  NMR spectrum of Fmoc-L-Htyr(OtBu)-OH (**8**) in  $\text{CDCl}_3$

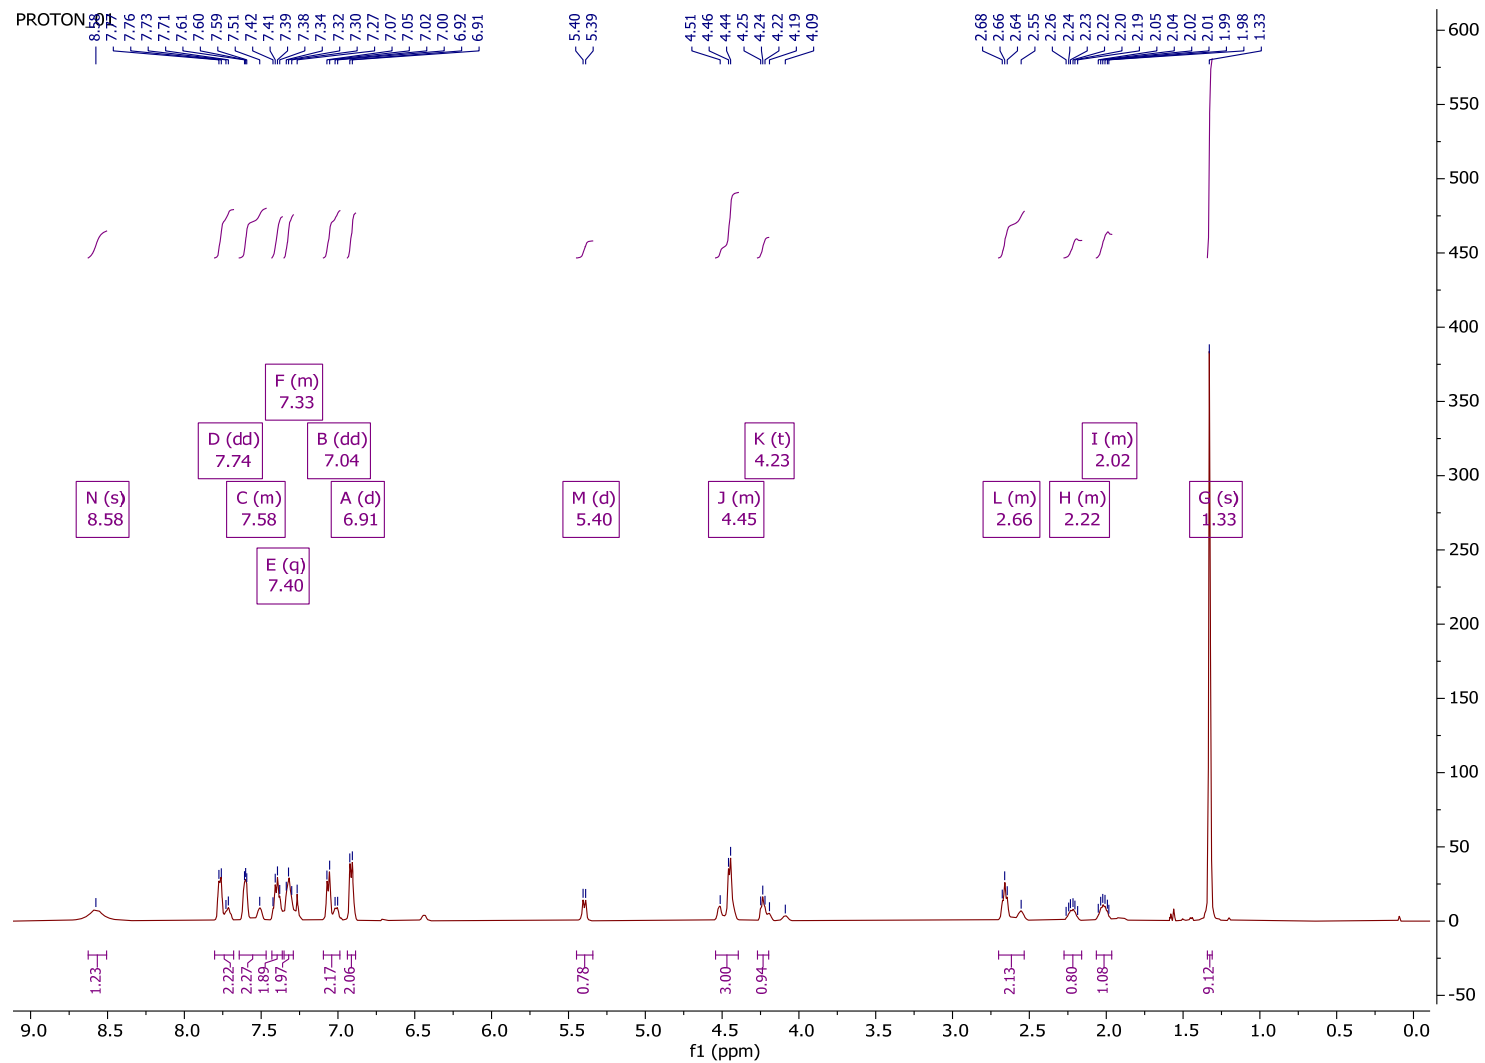

c)  $^{13}\text{C}$  NMR-APT spectrum of Fmoc-L-Htyr(OtBu)-OH (**8**) in  $\text{CDCl}_3$

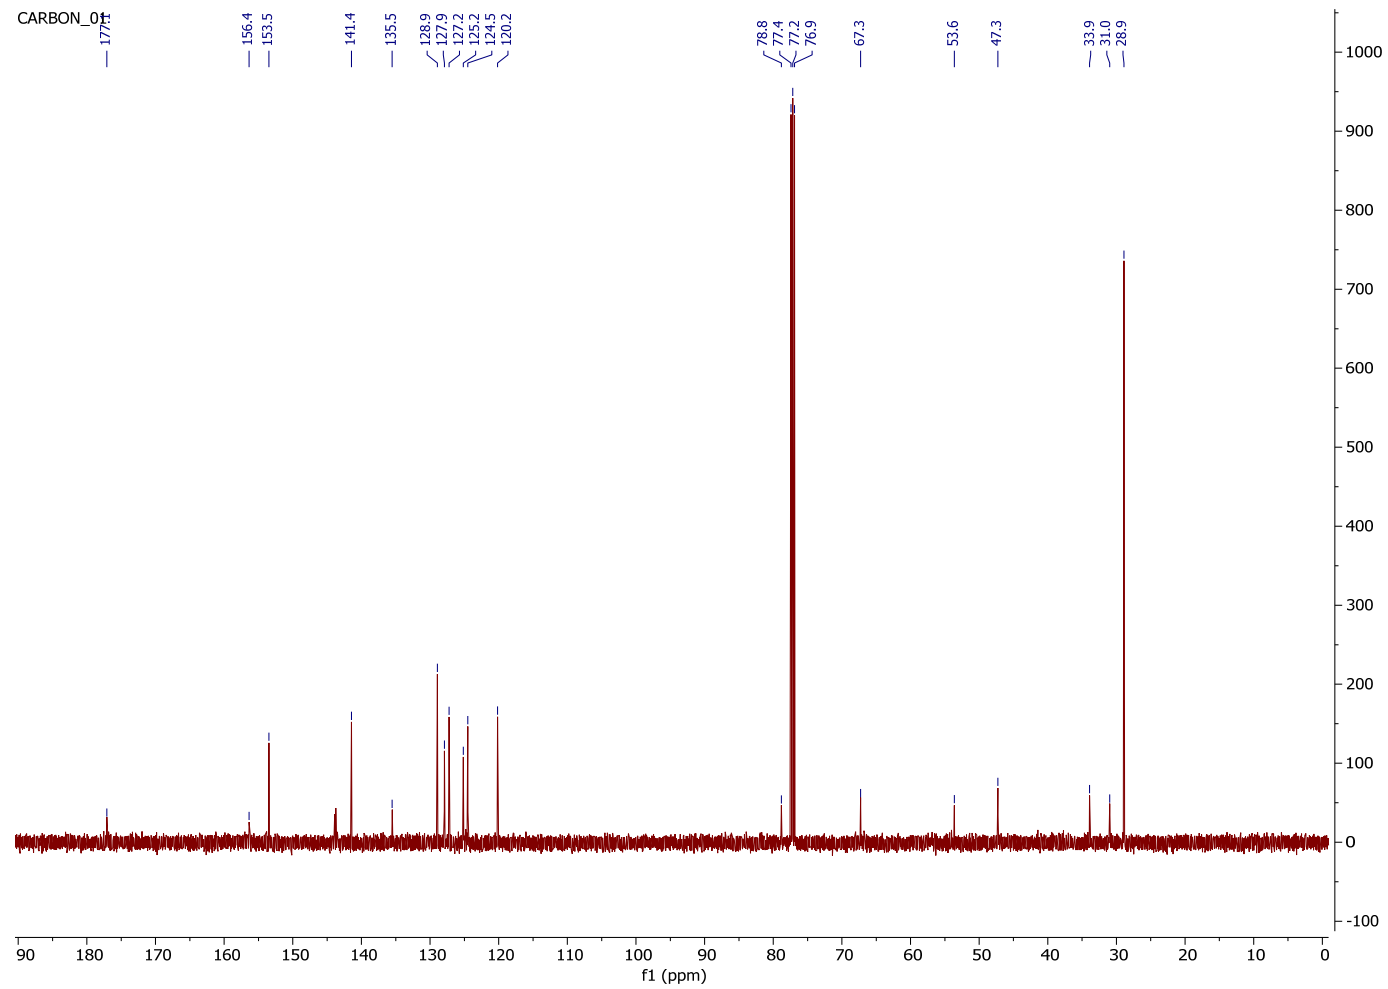



d) HRMS spectrum of Fmoc-L-Htyr(OtBu)-OH (**8**)

$[M + Na]^+$  calculated for  $C_{29}H_{31}NO_5Na$  : 496.2094, found 496.2129.

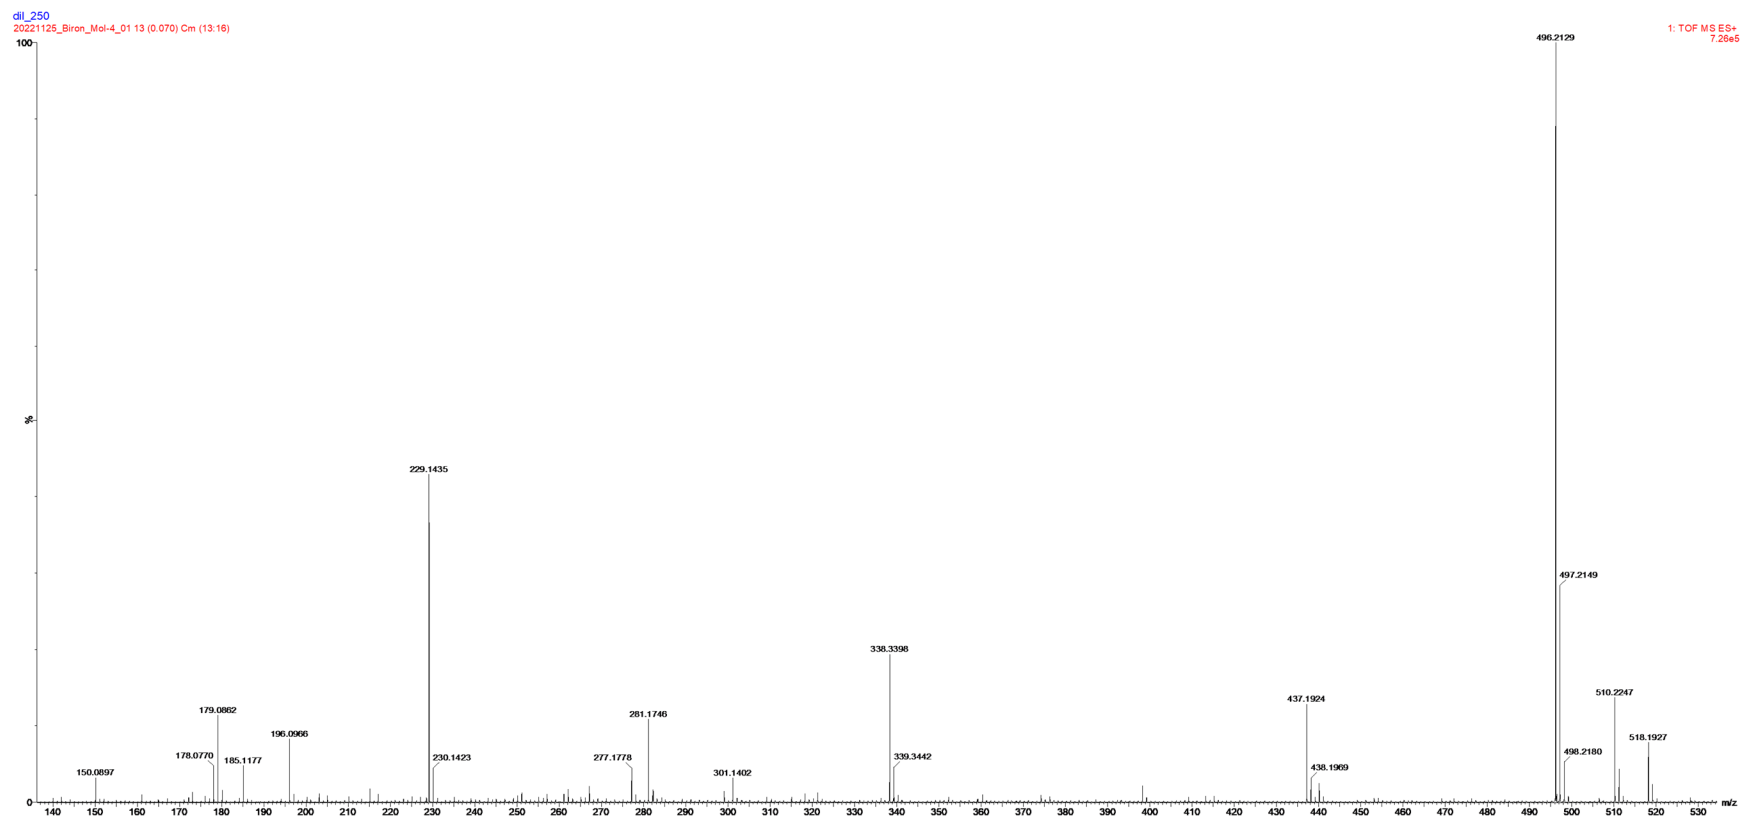

**Figure S7.** Characterization of Boc-D-Lys(Fmoc)-Oall.

a)  $^1\text{H}$  NMR spectrum of Boc-D-Lys(Fmoc)-Oall in  $\text{CDCl}_3$

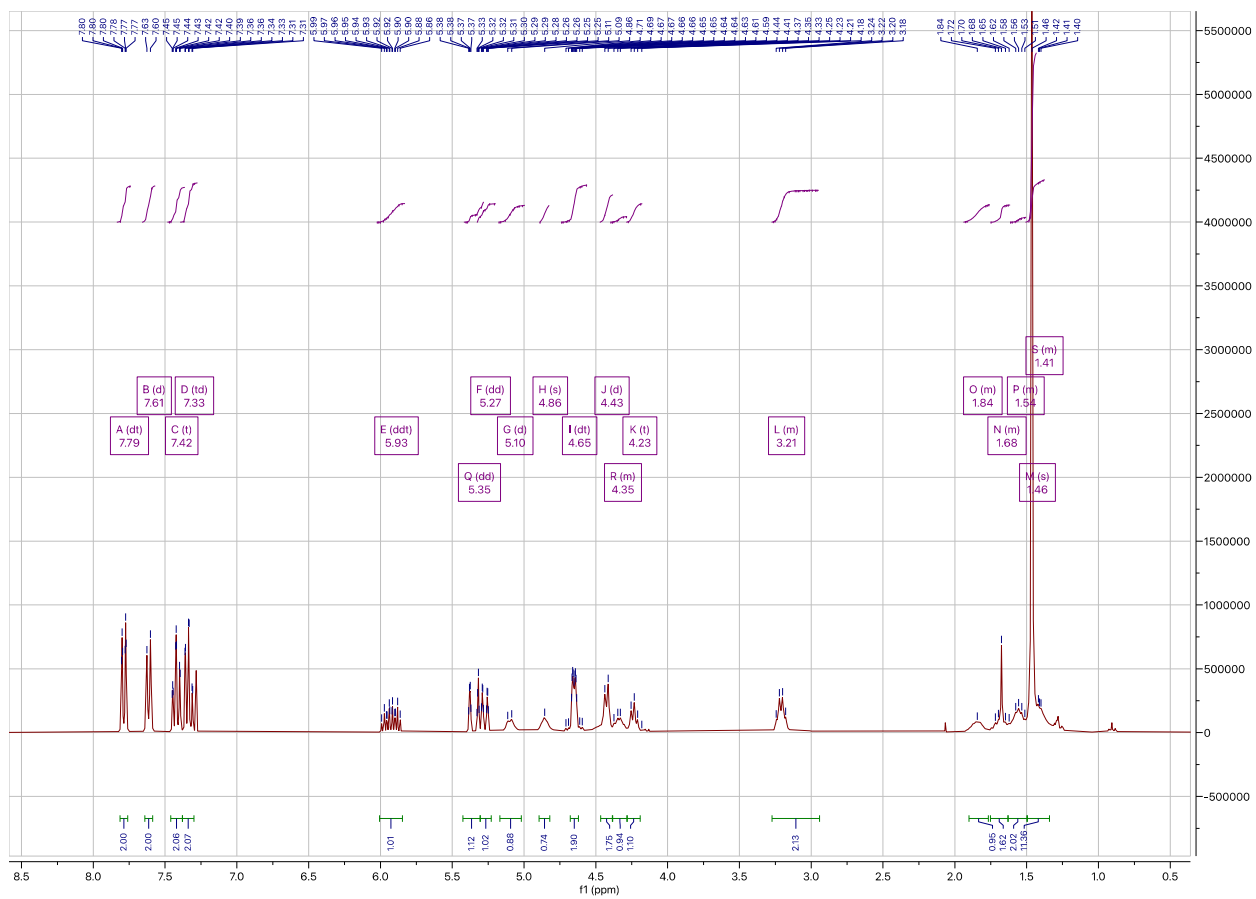

b)  $^{13}\text{C}$  NMR-APT spectrum of Boc-D-Lys(Fmoc)-Oall in  $\text{CDCl}_3$

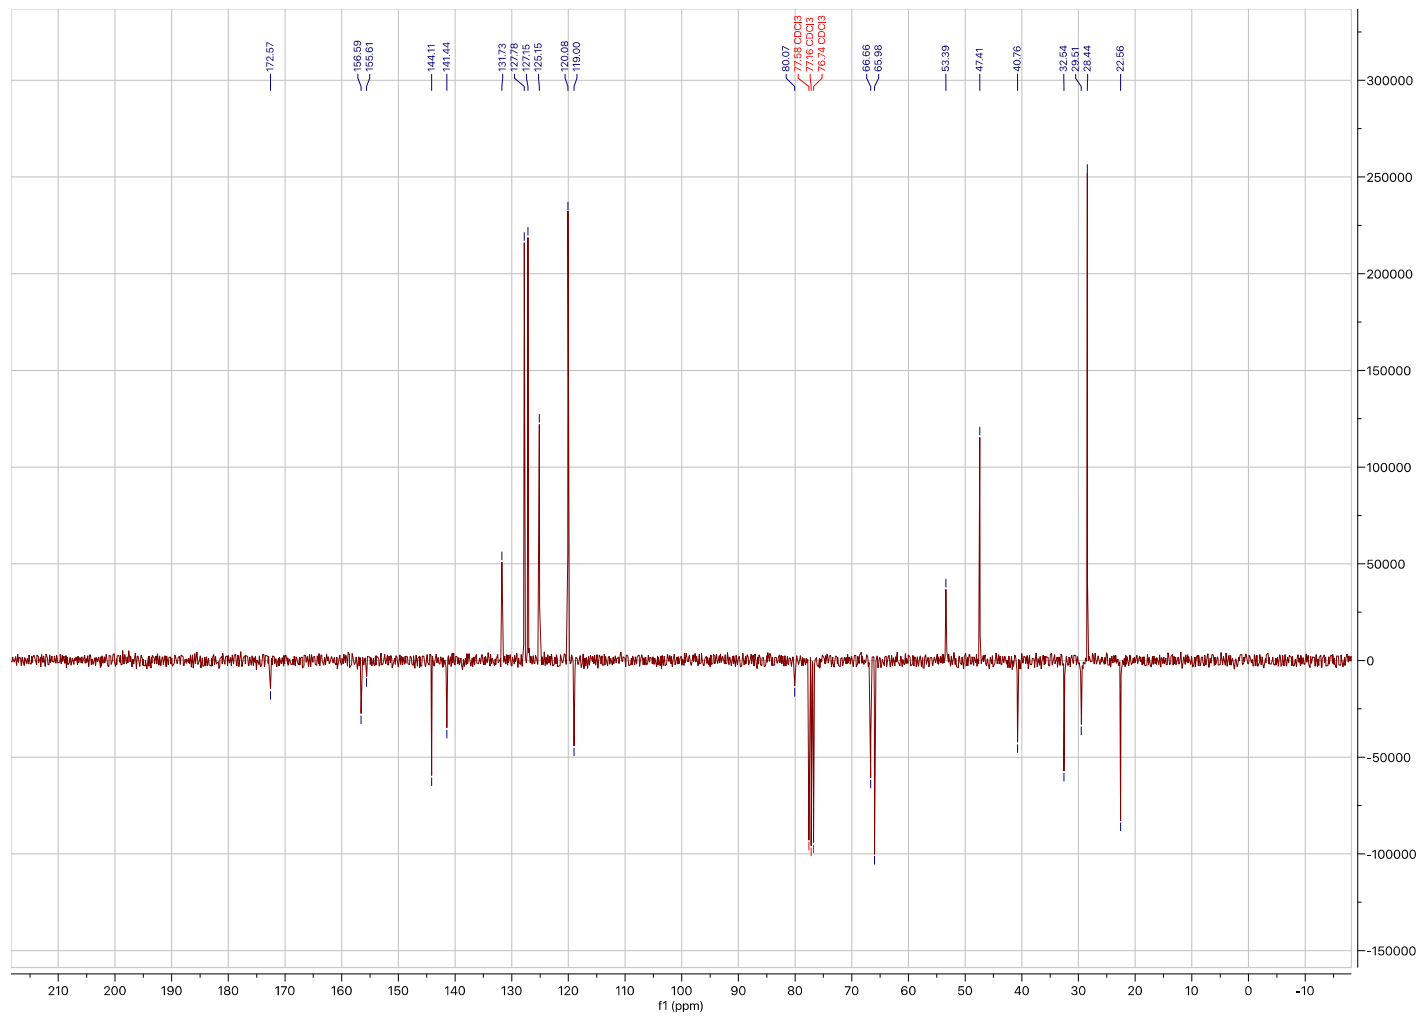

c) HRMS spectrum of Boc-D-Lys(Fmoc)-Oall

$[M + Na]^+$  calculated for  $C_{29}H_{36}N_2O_6Na$  531.2575; found 531.2510.

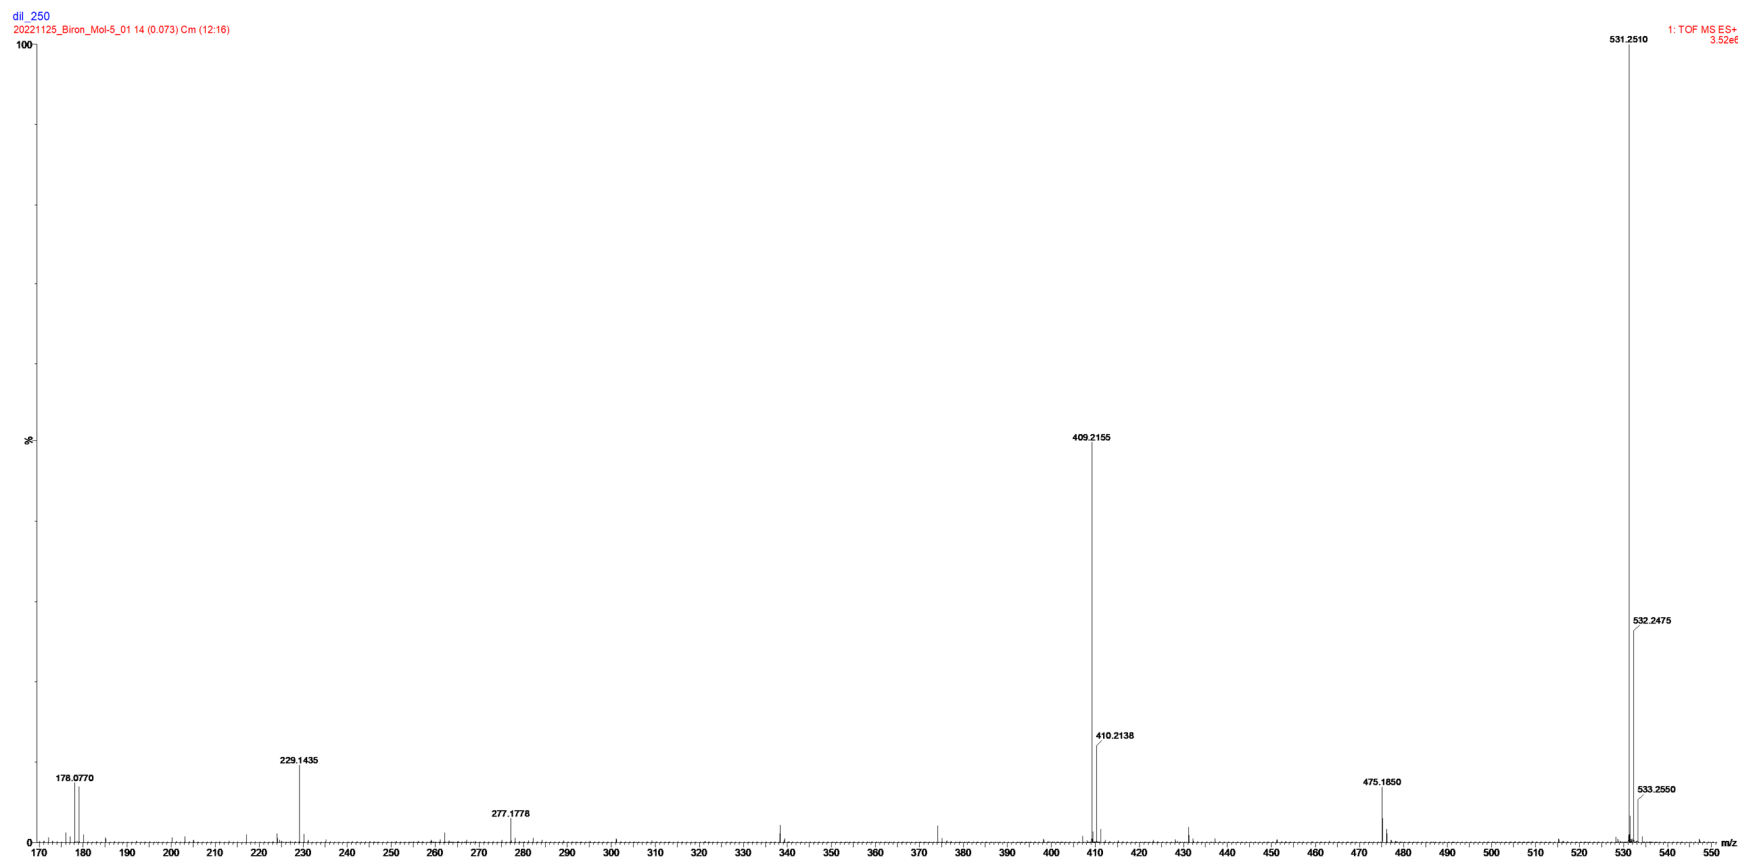

**Figure S8.** Characterization of anabaenopeptin F *L-allo-Ile4* (**10**).

a) HPLC profile of purified anabaenopeptin F *L-allo-Ile4* (**10**) ( $\lambda = 220\text{nm}$ )

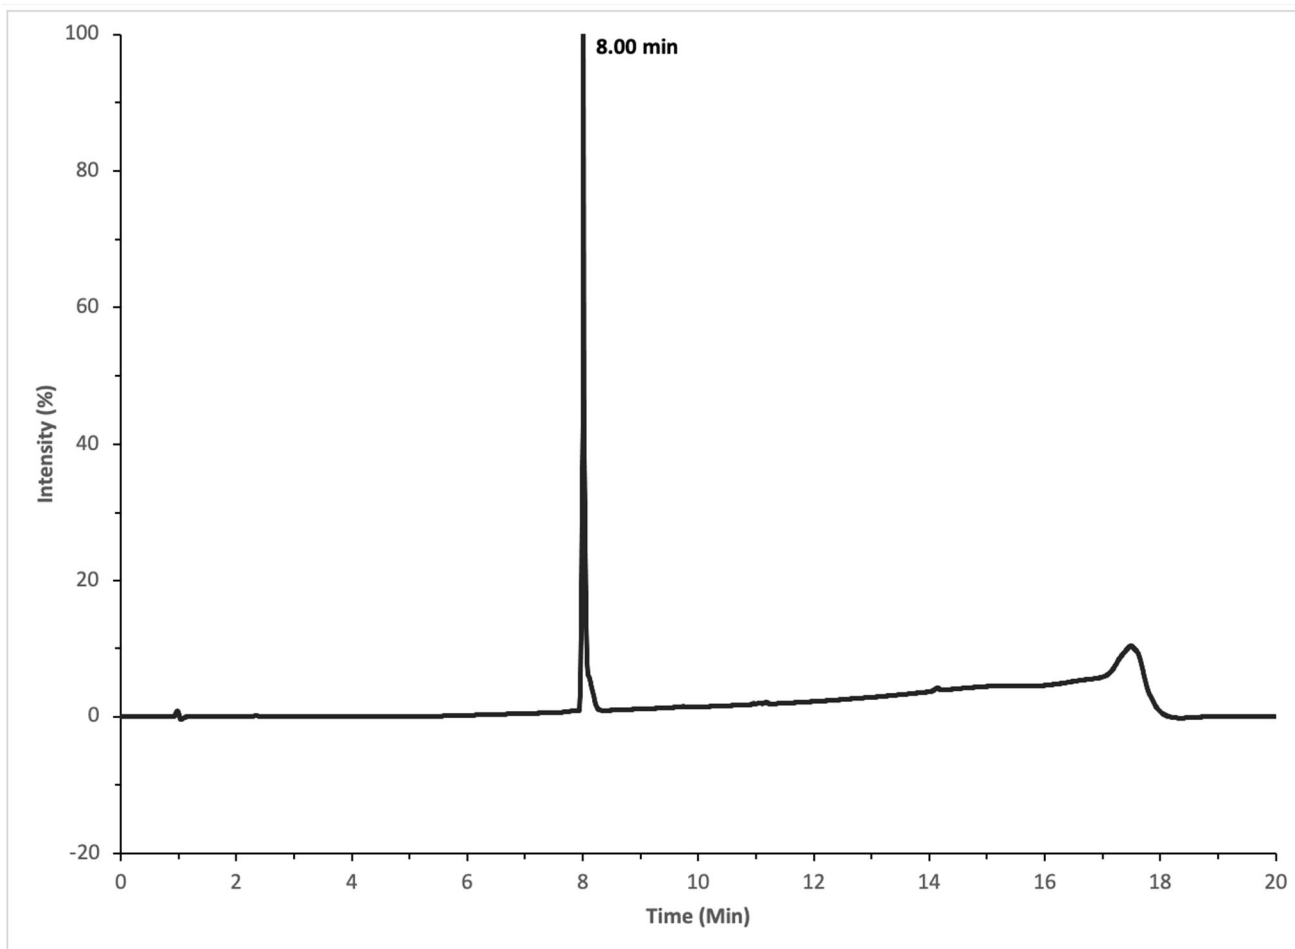

b)  $^1\text{H}$  NMR spectrum of anabaenopeptin F L-*allo*-Ile4 (**10**) in DMSO- $d_6$

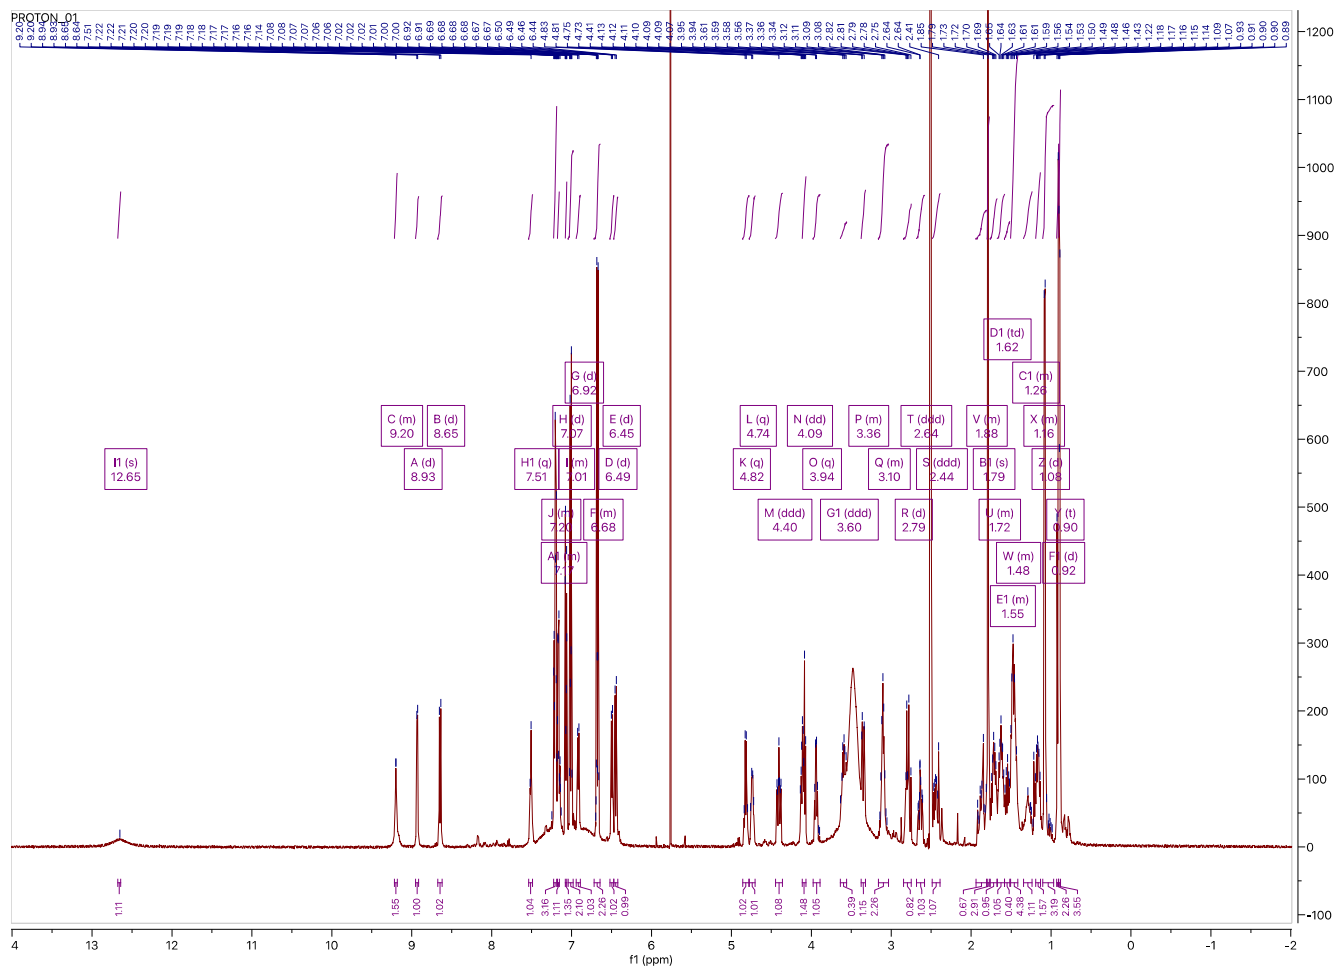

c)  $^1\text{H}$ - $^1\text{H}$  COSY spectrum of anabaenopeptin F L-*allo*-Ile4 (**10**) in DMSO- $d_6$

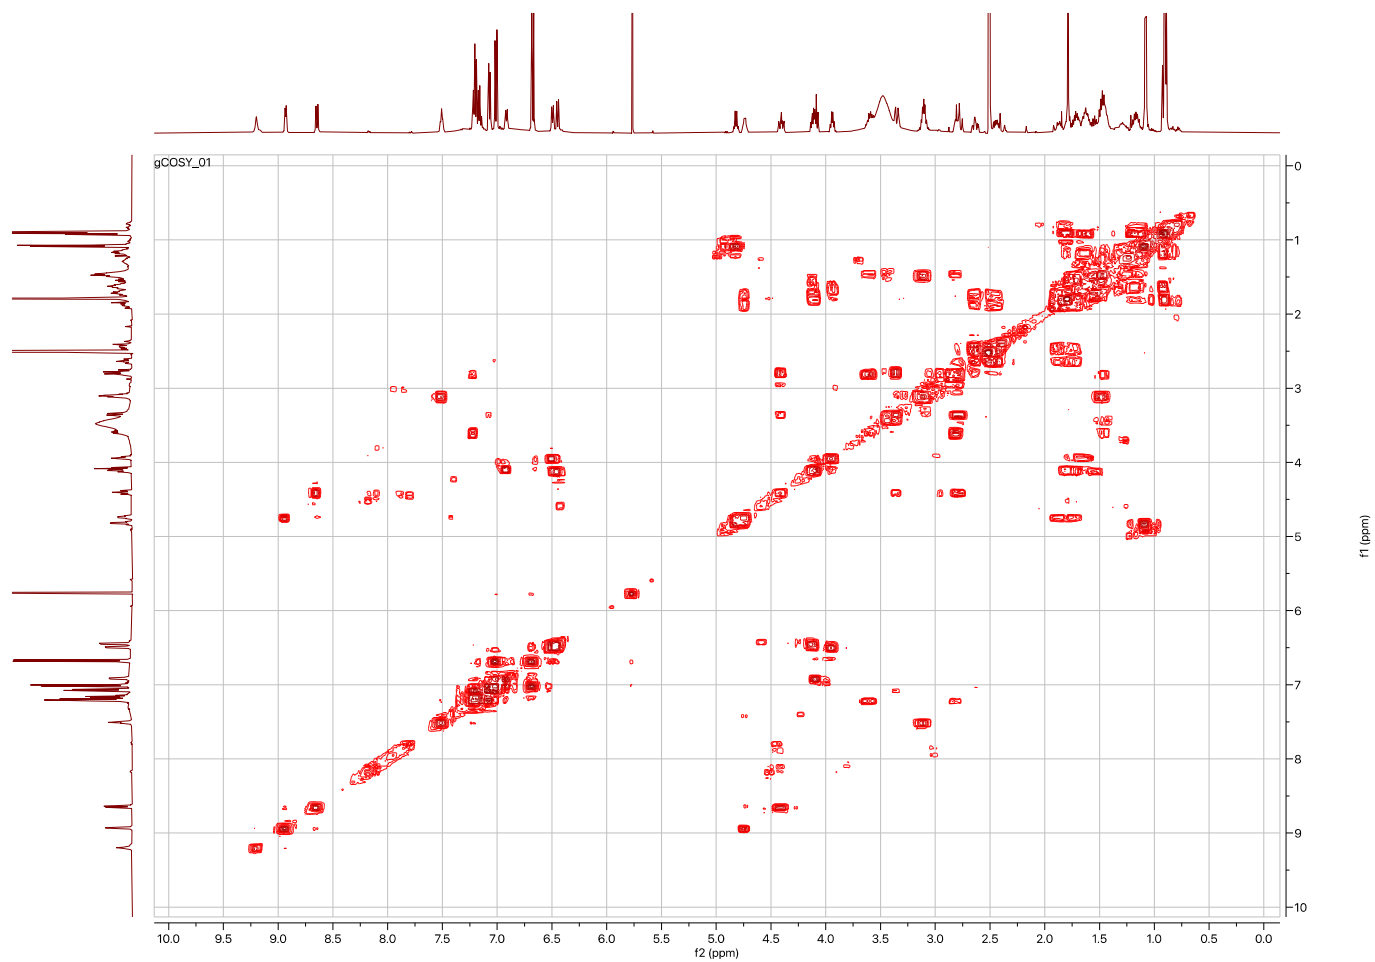

d) HSQC spectrum of anabaenopeptin F L-*allo*-Ile4 (**10**) in DMSO-d<sub>6</sub>

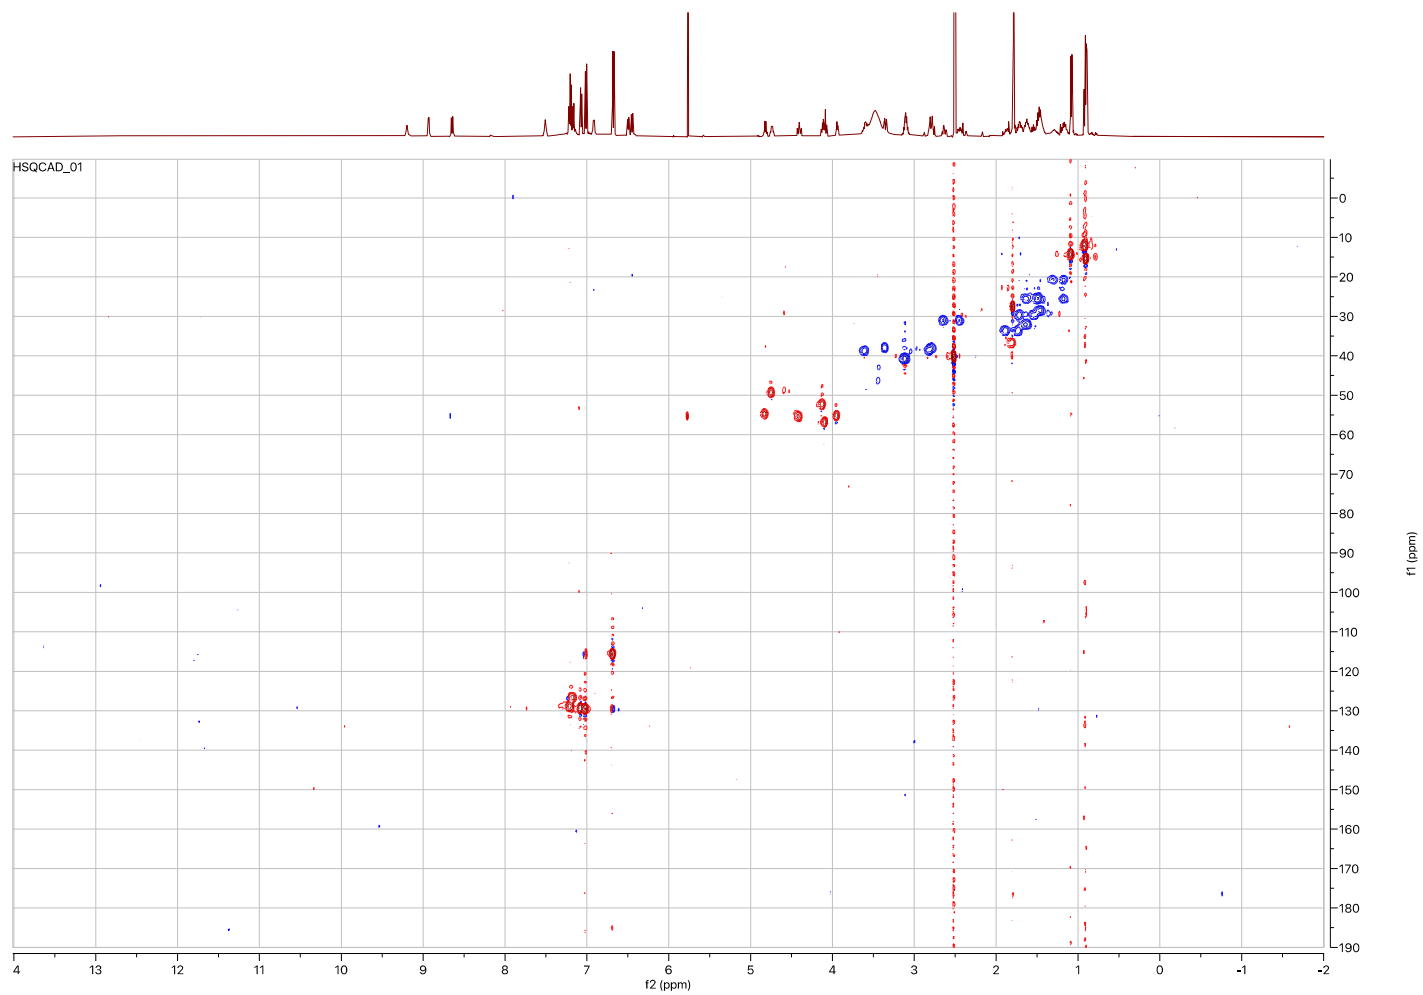



e) HRMS spectrum of anabaenopeptin F L-*allo*-Ile4 (**10**)

$[M + H]^+$  calculated for  $C_{42}H_{63}N_{10}O_9$ : 851.4744, found 851.4854.

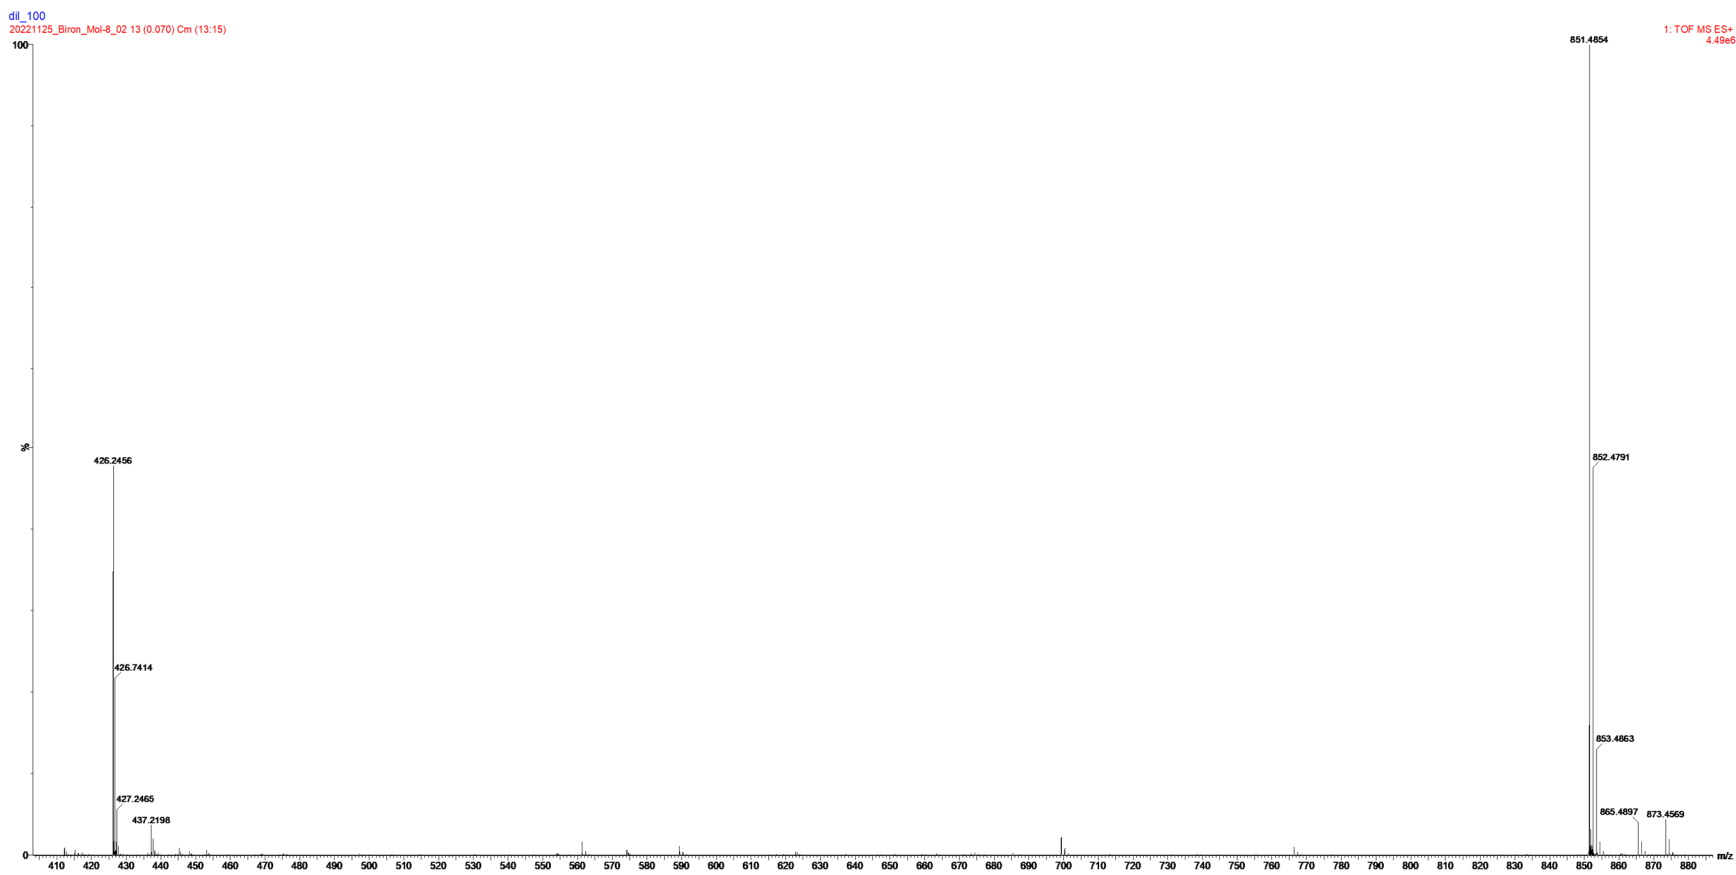

**Figure S9.** Carboxypeptidase B inhibition assay of anabaenopeptin F (**1**) (left) and anabaenopeptin F *L-allo*-Ile4 (**10**) (right).

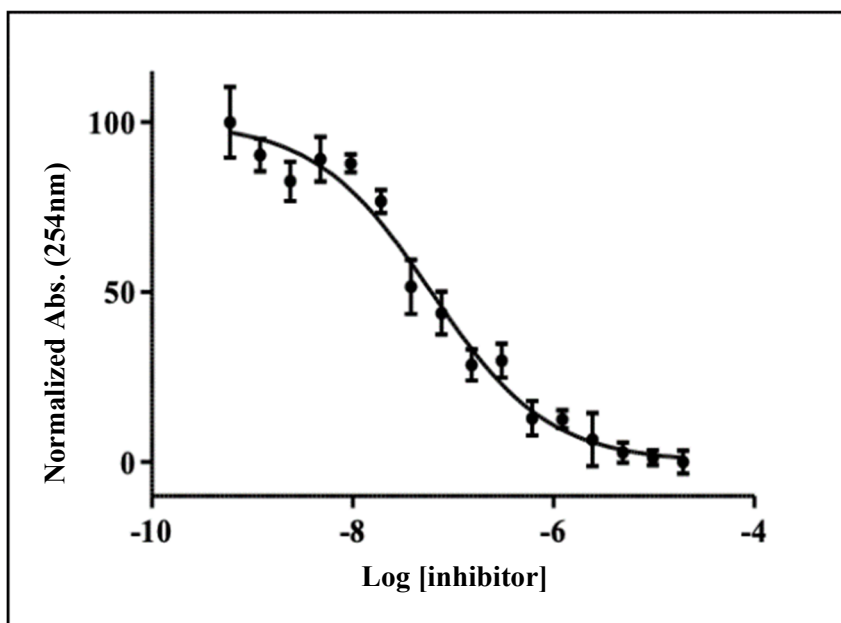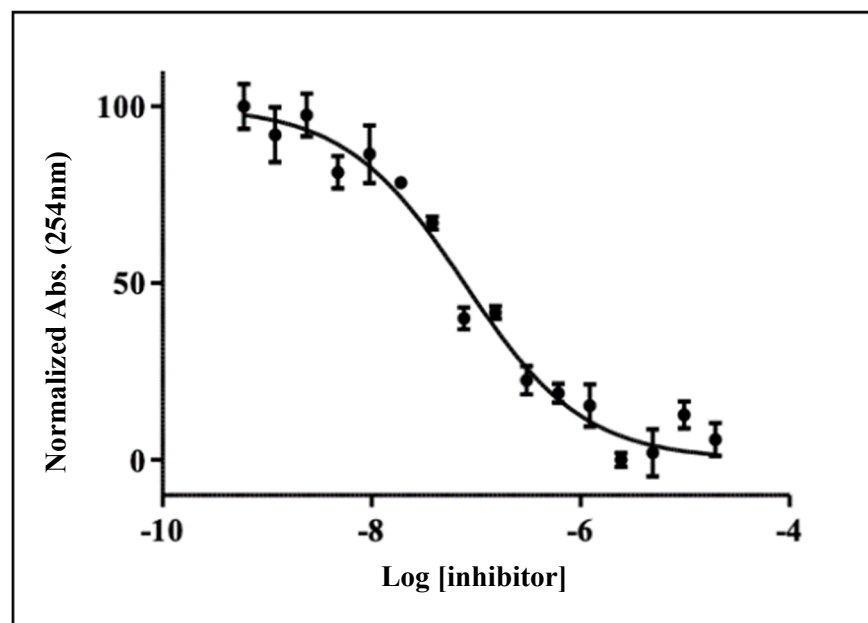

**Table S1** – Chemical shift table of isolated and synthetic ABP F (1) and (10)

|                | Isolated ABP F<br>(Brönstrup, 2016) | Synthetic ABP F 1                          | Synthetic ABP F L- <i>allo</i> -Ile4<br>10 |
|----------------|-------------------------------------|--------------------------------------------|--------------------------------------------|
|                | Position                            | $\delta_{\text{H}}$ , mult., <i>J</i> (Hz) | $\delta_{\text{H}}$ , mult., <i>J</i> (Hz) |
| Phe (1)        | 1                                   | -                                          | -                                          |
|                | 2                                   | 4.38                                       | 4.38 (ddd, 12.5, 8.8, 3.4)                 |
|                | 3                                   | 2.77                                       | 2.78 (dd, 13.9, 11.8)                      |
|                |                                     | 3.31                                       | 3.33 (dd, 13.9, 3.4)                       |
|                | 4                                   | -                                          | -                                          |
|                | 5, 9                                | 7.06                                       | 7.06 (d, 7.0)                              |
|                | 6, 8                                | 7.19                                       | 7.18 (m)                                   |
|                | 7                                   | 7.15                                       | 7.14 (m)                                   |
| NMeAla (2)     | NH                                  | 8.62                                       | 8.69 (d, 8.8)                              |
|                | 1                                   | -                                          | -                                          |
|                | 2                                   | 4.77                                       | 4.79 (q, 6.9)                              |
|                | 3                                   | 1.06                                       | 1.06 (d, 6.7)                              |
| Htyr (3)       | NMe                                 | 1.78                                       | 1.76 (s)                                   |
|                | 1                                   | -                                          | -                                          |
|                | 2                                   | 4.71                                       | 4.72 (ddd 7.9, 5.4, 5.4)                   |
|                | 3                                   | 1.71                                       | 1.72 (m)                                   |
|                |                                     | 1.87                                       | 1.88 (m)                                   |
|                | 4                                   | 2.43                                       | 2.43 (ddd, 13.6, 11.0, 6.5)                |
|                |                                     | 2.63                                       | 2.63 (ddd, 13.6, 11.0, 4.4)                |
|                | 5                                   | -                                          | -                                          |
|                | 6, 10                               | 7.00                                       | 6.98 (d, 8.0)                              |
|                | 7, 9                                | 6.67                                       | 6.66 (d, 8.0)                              |
| Ile (4)        | 8                                   | -                                          | -                                          |
|                | NH                                  | 8.92                                       | 8.93 (d 4.3)                               |
|                | 1                                   | -                                          | -                                          |
|                | 2                                   | 4.04                                       | 4.08 (dd, 7.7, 7.1)                        |
|                | 3                                   | 1.76                                       | 1.76 (m)                                   |
|                | 4                                   | 1.16                                       | 1.15 (m)                                   |
|                |                                     | 1.62                                       | 1.61 (m)                                   |
|                | 5                                   | 0.88                                       | 0.82 (t, 7.4)                              |
|                | 6                                   | 0.89                                       | 0.88 (d, 6.5)                              |
|                | NH                                  | 6.93                                       | 6.92 (d, 7.0)                              |
| Lys (5)        | 1                                   | -                                          | -                                          |
|                | 2                                   | 3.92                                       | 3.94 (ddd, 6.7, 6.7, 4.2)                  |
|                | 3                                   | 1.56                                       | 1.61 (m)                                   |
|                |                                     | 1.61                                       |                                            |
|                | 4                                   | 1.18                                       | 1.15 (m)                                   |
|                |                                     | 1.29                                       | 1.31 (m)                                   |
|                | 5                                   | 1.44                                       | 1.47 (m)                                   |
|                | 6                                   | 2.80                                       | 2.78 (m)                                   |
|                |                                     | 3.56                                       | 3.59 (dddd, 13.6, 8.8, 8.8, 4.2)           |
|                | $\alpha$ -NH                        | 6.62                                       | 6.46 (d, 7.1)                              |
| Arg (6)        | $\epsilon$ -NH                      | 7.14                                       | 7.15 (m)                                   |
|                | 1                                   | -                                          | -                                          |
|                | 2                                   | 3.78                                       | 4.10 (ddd, 8.0, 7.9, 5.0)                  |
|                | 3                                   | 1.55                                       | 1.54 (m)                                   |
|                |                                     |                                            | 1.72 (m)                                   |
|                | 4                                   | 1.36                                       | 1.47 (m)                                   |
|                |                                     | 1.46                                       |                                            |
|                | 5                                   | 3.01                                       | 3.10 (m)                                   |
|                | 6                                   | -                                          | -                                          |
|                | $\alpha$ -NH                        | broad                                      | 6.46 (d, 8.1)                              |
| $\epsilon$ -NH | broad                               | 7.52 (t, 5.8)                              |                                            |
| COOH           | n.a.                                | 12.69                                      |                                            |
